# Supplementary material for: Leveraging Ligand Affinity and Properties: Discovery of Novel Benzamide-Type Cereblon Binders for the Design of PROTACs
Source: PubMed Central journal article supplement (PMC10641816; doi:10.1021/acs.jmedchem.3c00851), 2023-10-30
Supplement: jm3c00851_si_001.pdf [file jm3c00851_si_001.pdf]

## SUPPORTING INFORMATION

### **Leveraging Ligand Affinity and Properties: Discovery of Novel Benzamide-Type Cereblon Binders for the Design of PROTACs**

Christian Steinebach,<sup>a,#</sup> Aleša Bricelj,<sup>b,#</sup> Arunima Murgai,<sup>c,#</sup> Izidor Sosič,<sup>b</sup>  
Luca Bischof,<sup>d</sup> Yuen Lam Dora Ng,<sup>c</sup> Christopher Heim,<sup>d</sup> Samuel Maiwald,<sup>d</sup>  
Matic Proj,<sup>b</sup> Rabea Voget,<sup>a</sup> Felix Feller,<sup>a</sup> Janez Košmrlj,<sup>e</sup> Valeriia Sapozhnikova,<sup>c,f,g</sup>  
Annika Schmidt,<sup>c</sup> Maximilian Rudolf Zuleeg,<sup>c</sup> Patricia Lemnitzer,<sup>c</sup> Philipp Mertins,<sup>f,h</sup>  
Finn K. Hansen,<sup>a</sup> Michael Gütschow,<sup>a</sup> Jan Krönke,<sup>c,g,\*</sup> and Marcus D. Hartmann<sup>d,i,\*</sup>

<sup>a</sup> Pharmaceutical Institute, University of Bonn, D-53121 Bonn, Germany

<sup>b</sup> Faculty of Pharmacy, University of Ljubljana, SI-1000 Ljubljana, Slovenia

<sup>c</sup> Department of Hematology, Oncology, and Cancer Immunology, Charité -  
Universitätsmedizin Berlin, corporate member of Freie Universität Berlin, Humboldt-  
Universität zu Berlin, D-12203 Berlin, Germany

<sup>d</sup> Max Planck Institute for Biology Tübingen, D-72076 Tübingen, Germany

<sup>e</sup> Faculty of Chemistry and Chemical Technology, University of Ljubljana, SI 1000 Ljubljana,  
Slovenia

<sup>f</sup> Max Delbrück Center for Molecular Medicine, D-13125 Berlin, Germany

<sup>g</sup> German Cancer Consortium (DKTK), Partner Site Berlin, DKFZ, D-69120 Heidelberg,  
Germany

<sup>h</sup> Berlin Institute of Health, D-10178 Berlin, Germany

<sup>i</sup> Interfaculty Institute of Biochemistry, University of Tübingen, D-72076 Tübingen, Germany

# These authors contributed equally

#### **Corresponding Authors**

\* Email: jan.kroenke@charite.de (J.Kr.);

\* Email: marcus.hartmann@tuebingen.mpg.de (M.D.H.)

# Table of Content

|                                                                                                                     |           |
|---------------------------------------------------------------------------------------------------------------------|-----------|
| <b>Supporting Figures, Schemes, and Tables.....</b>                                                                 | <b>3</b>  |
| <b>Figure S1.</b> Section of the $^1\text{H}$ - $^{13}\text{C}$ HMBC NMR spectrum of <b>14</b> in DMSO- $d_6$ ..... | 3         |
| <b>Figure S2.</b> Torsion angle scans of compounds <b>8c</b> , <b>8d</b> , and <b>11a-f</b> .....                   | 4         |
| <b>Figure S3.</b> Correlation between physiochemical properties of <b>8c</b> , <b>8d</b> and <b>11</b> .....        | 5         |
| <b>Figure S4.</b> Neosubstrate modulation by benzamides <b>11</b> and established IMiDs.....                        | 6         |
| <b>Figure S5.</b> Effects of linker-connected CRBN ligands <b>15-23</b> on neosubstrates.....                       | 6         |
| <b>Figure S6.</b> Evaluation of BRD4 PROTACs <b>43-45</b> in MV4;11 cells.....                                      | 7         |
| <b>Figure S7.</b> Concentration dependent analysis of BRD4 degradation by PROTACs.....                              | 8         |
| <b>Figure S8.</b> Additional physiochemical properties of selected compounds.....                                   | 9         |
| <b>Figure S9.</b> Proteins regulated by PROTAC <b>44h</b> .....                                                     | 10        |
| <b>Figure S10.</b> Dose-response curves for patent structures <b>52-54</b> .....                                    | 10        |
| <b>Scheme S1.</b> Synthesis of comparators <b>52-54</b> .....                                                       | 11        |
| <b>Table S1.</b> Sub-van der Waals distances observed for the crystallized compounds.....                           | 11        |
| <b>Table S2.</b> X-ray data collection and processing.....                                                          | 10        |
| <b>Table S3.</b> X-ray structure solution and refinement.....                                                       | 11        |
| <b>Synthetic Procedures for Compounds 55-59.....</b>                                                                | <b>12</b> |
| <b>Materials and Methods Proteomics.....</b>                                                                        | <b>14</b> |
| <b>Selected NMR and LC/MS Data.....</b>                                                                             | <b>16</b> |
| <b>References.....</b>                                                                                              | <b>30</b> |

## Supporting Figures, Schemes, and Tables

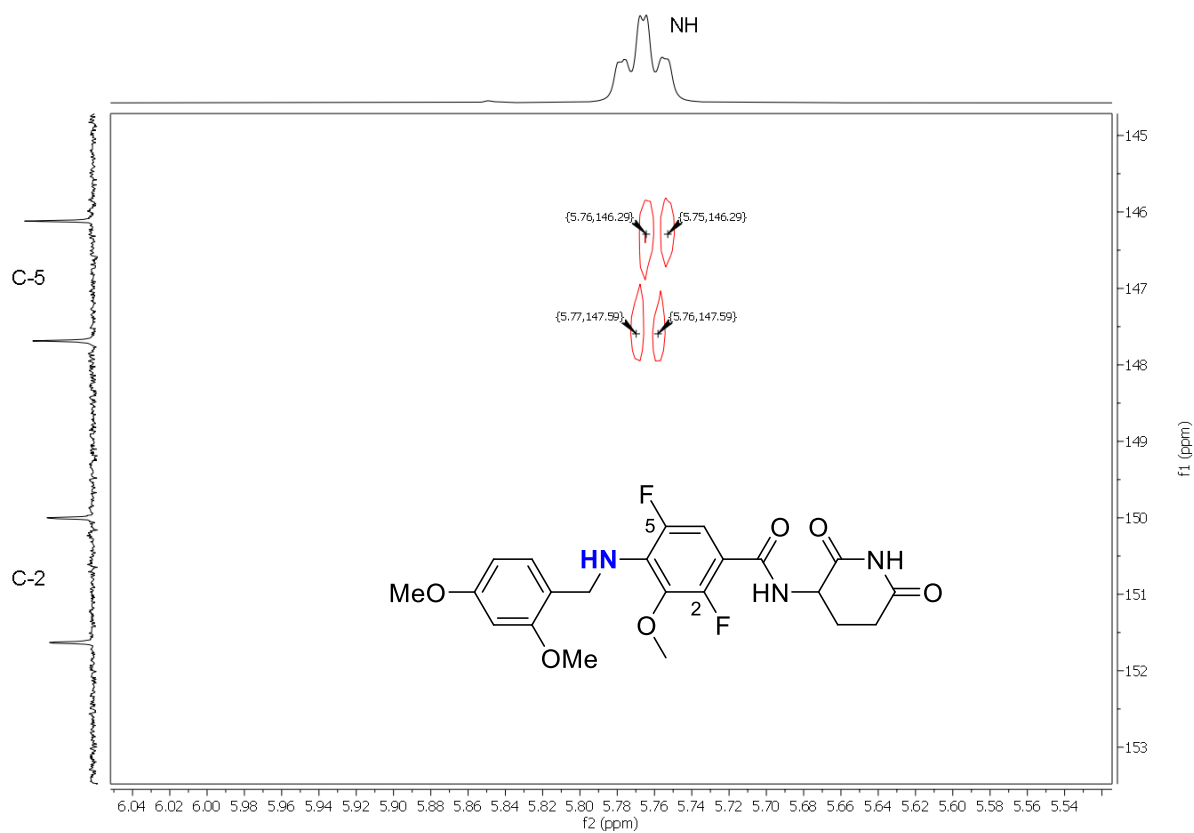

**Figure S1.** Section of the  $^1\text{H}$ - $^{13}\text{C}$  HMBC NMR spectrum of **14** in  $\text{DMSO-}d_6$ .

*Torsion scan:*

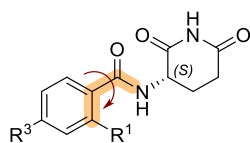

**(S)-8c**

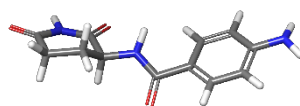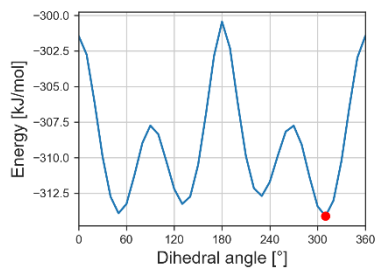

**(S)-8d**

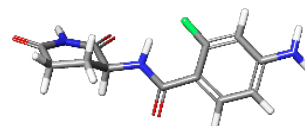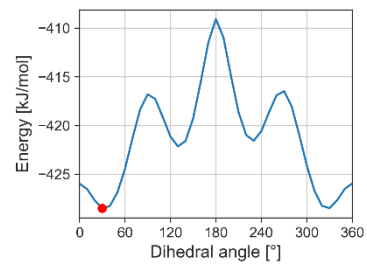

**(S)-11a**

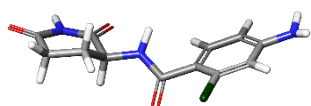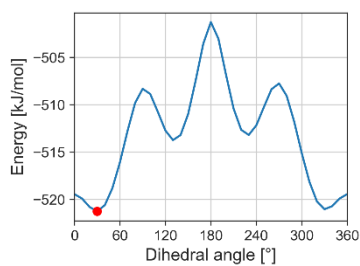

**(S)-11b**

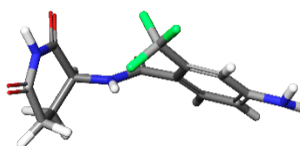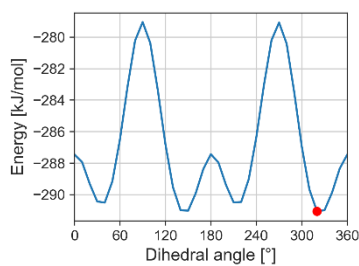

**(S)-11c**

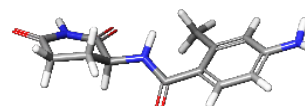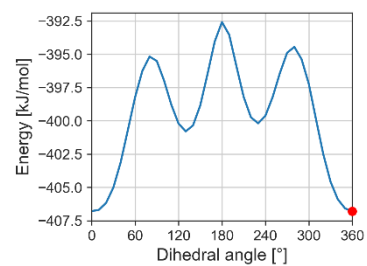

**(S)-11d**

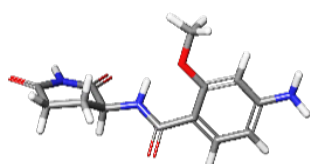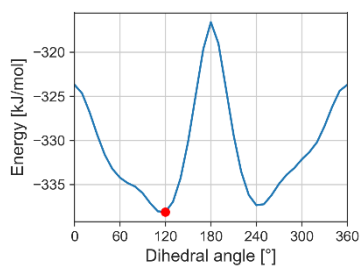

**(S)-11e**

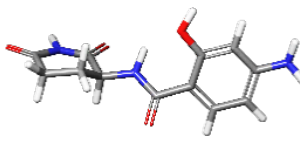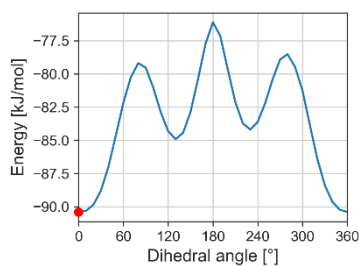

**(S)-11f**

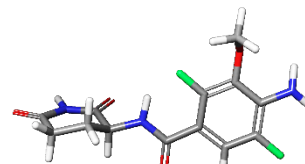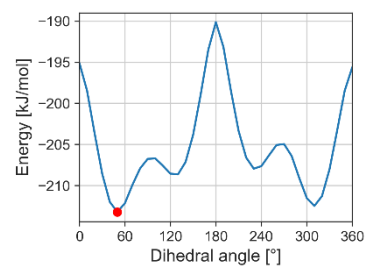

**Figure S2.** Torsion angle scans of compounds **8c**, **8d**, and **11a-f**. For simplification, only the *S*-configured compound was considered. Red dot denotes global minimum.

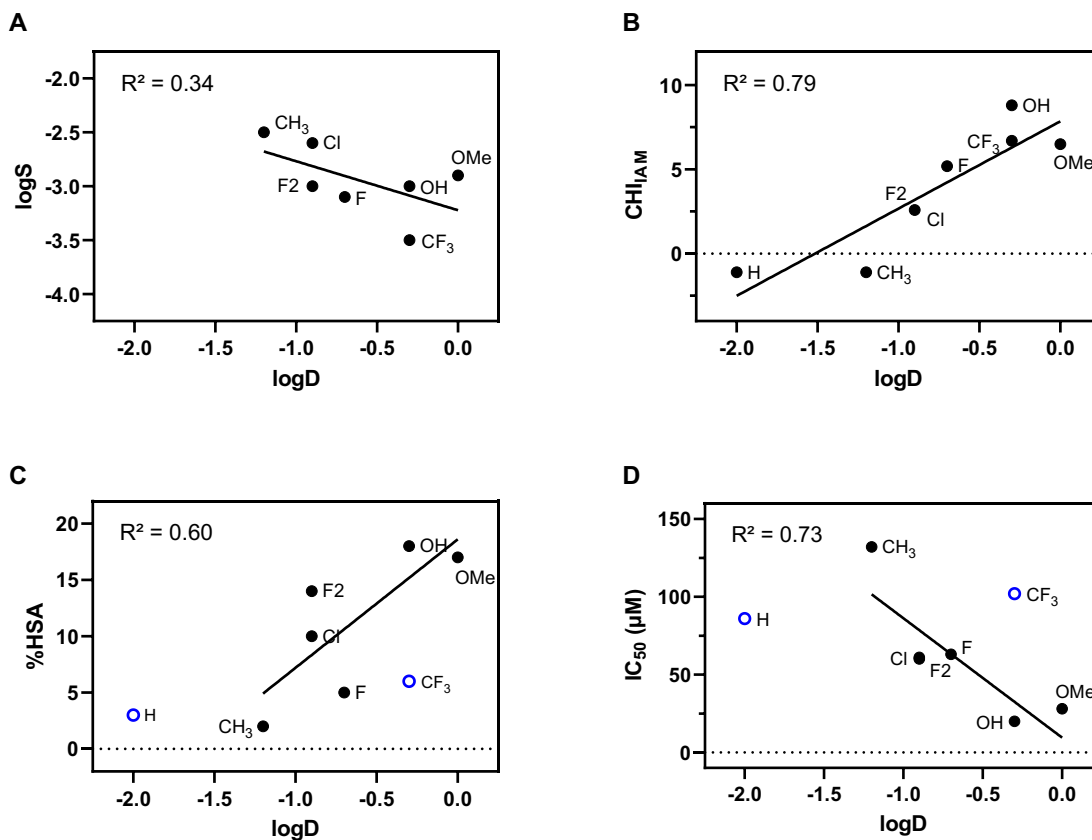

**Figure S3.** Correlation between physicochemical properties of **8c**, **8d** and **11** (for structures, see also Figure S2). (A) Logarithm of the solubility measured in mol/L at pH 6.8 by an HPLC-based method. (B) Chromatographic hydrophobicity index values referring to IAM chromatography (CHI<sub>IAM</sub> values), an estimate for drug-membrane interactions and permeability. (C) Plasma protein binding, experimentally determined percentage of compound bound to human serum albumin. Compounds with blue circles were not considered in the linear regression. (D) Inhibitory concentration referring to a competitive MST experiment using the hTBD and our previously described reporter molecule.<sup>1</sup> Compounds with blue circles were not considered in the linear regression.

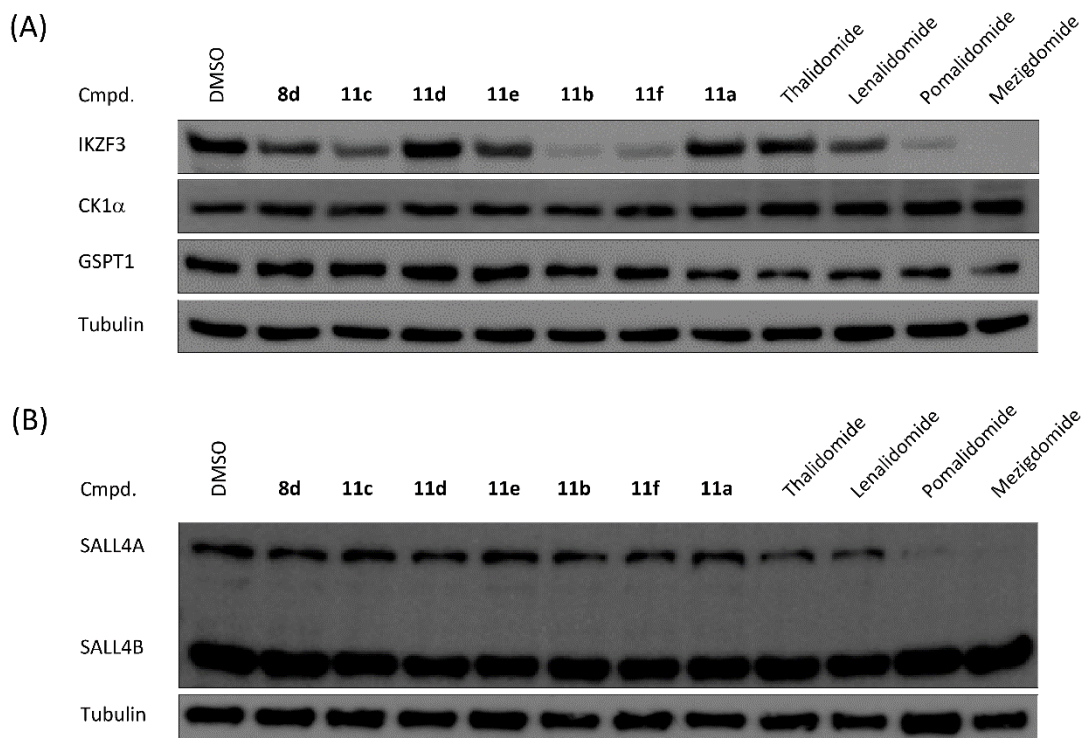

**Figure S4.** Neosubstrate modulation by benzamides **11** and established IMiDs. (A) MM.1S cells were treated with 0.1  $\mu$ M of each compound for 16 h before lysis and blotting for IKZF3, GSPT1, and CK1 $\alpha$ . (B) HuH6 cells were treated with 0.1  $\mu$ M of compound for 16 h before lysis and blotting for SALL4.

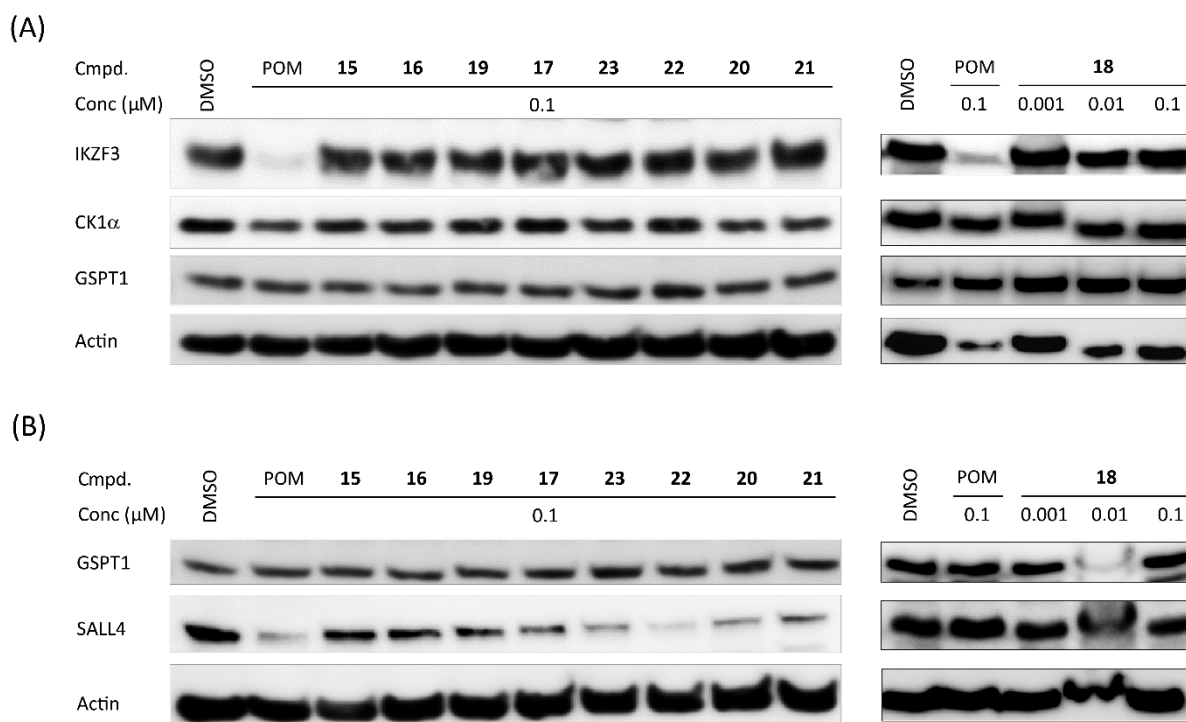

**Figure S5.** Effects of linker-connected CRBN ligands **15-23** on neosubstrates. (A) MM.1S cells were treated with 0.1  $\mu$ M of compound for 16 h before lysis and blotting for IKZF3, CK1 $\alpha$ , and GSPT1. (B) HuH6 cells were treated with 0.1  $\mu$ M of compound for 16 h before blotting for GSPT1 and SALL4.

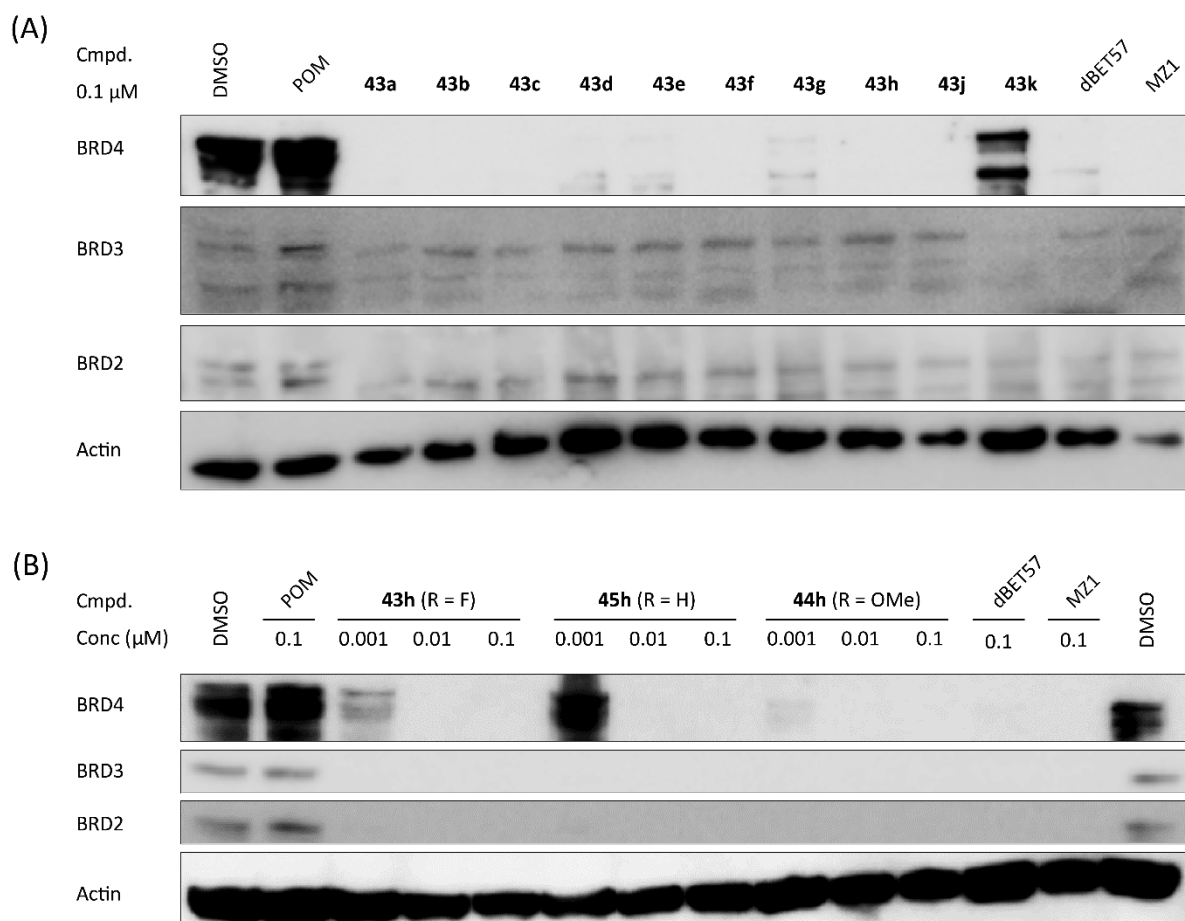

**Figure S6.** Evaluation of BRD4 PROTACs **43-45** in MV4;11 cells. (A) Western blot analyses of BRD4, BRD3, BRD2, and actin protein levels in MV4;11 cells treated with PROTACs **43** or the CRBN-recruiting reference dBET57 or the VHL-recruiting reference MZ1 for 24 h at 0.1  $\mu$ M. (B) Western blot analyses of the homologous series **43h**, **44h**, and **45h** at three different concentrations after treatment of MV4;11 cells for 24 h.

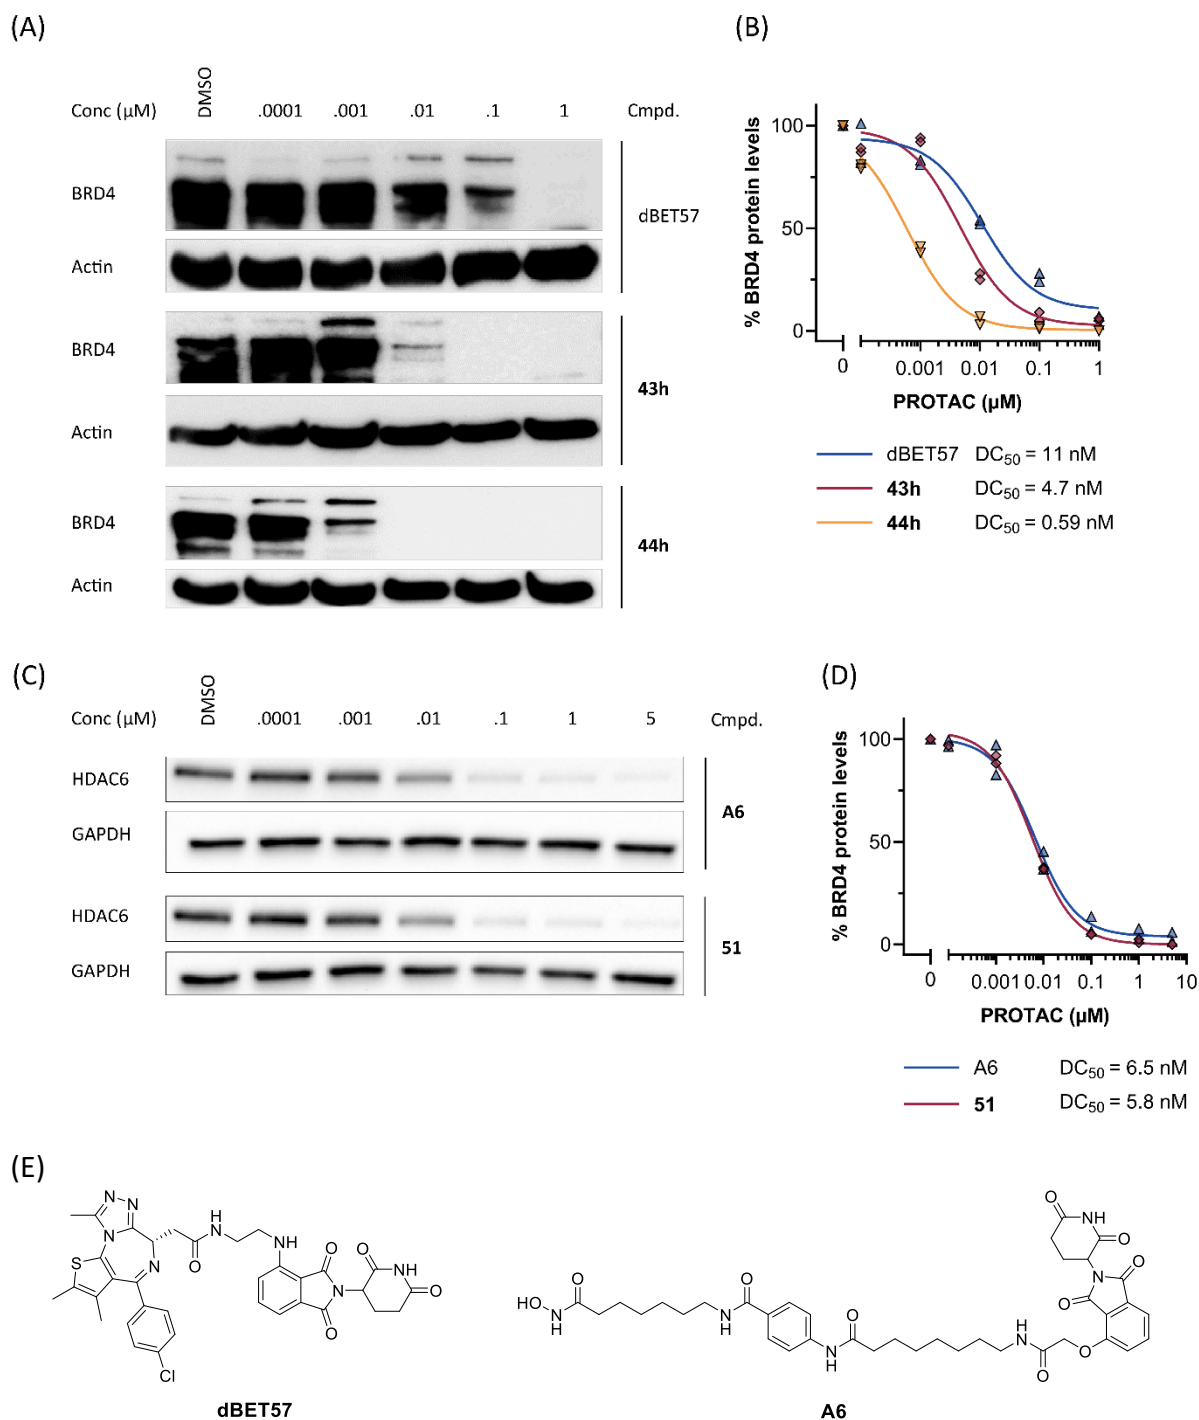

**Figure S7.** Concentration dependent analysis of BRD4 degradation by PROTACs. (A) PROTACs dBET57, **43h**, and **44h** induce BRD4 degradation in a dose-dependent manner. MOLT4 cells were treated with PROTACs at indicated concentrations for 24 h. (B) Quantification of (A) and calculation of the DC<sub>50</sub> values from repeats (n = 2). (C) PROTACs A6 and **51** induce HDAC6 degradation in a dose-dependent manner. MM.1S cells were treated with PROTACs at indicated concentrations for 24 h. (D) Quantification of (C) and calculation of the DC<sub>50</sub> values from repeats (n = 2). Representative blots and graphs are shown. (E) Chemical structures of the reference PROTACs dBET57 and A6.



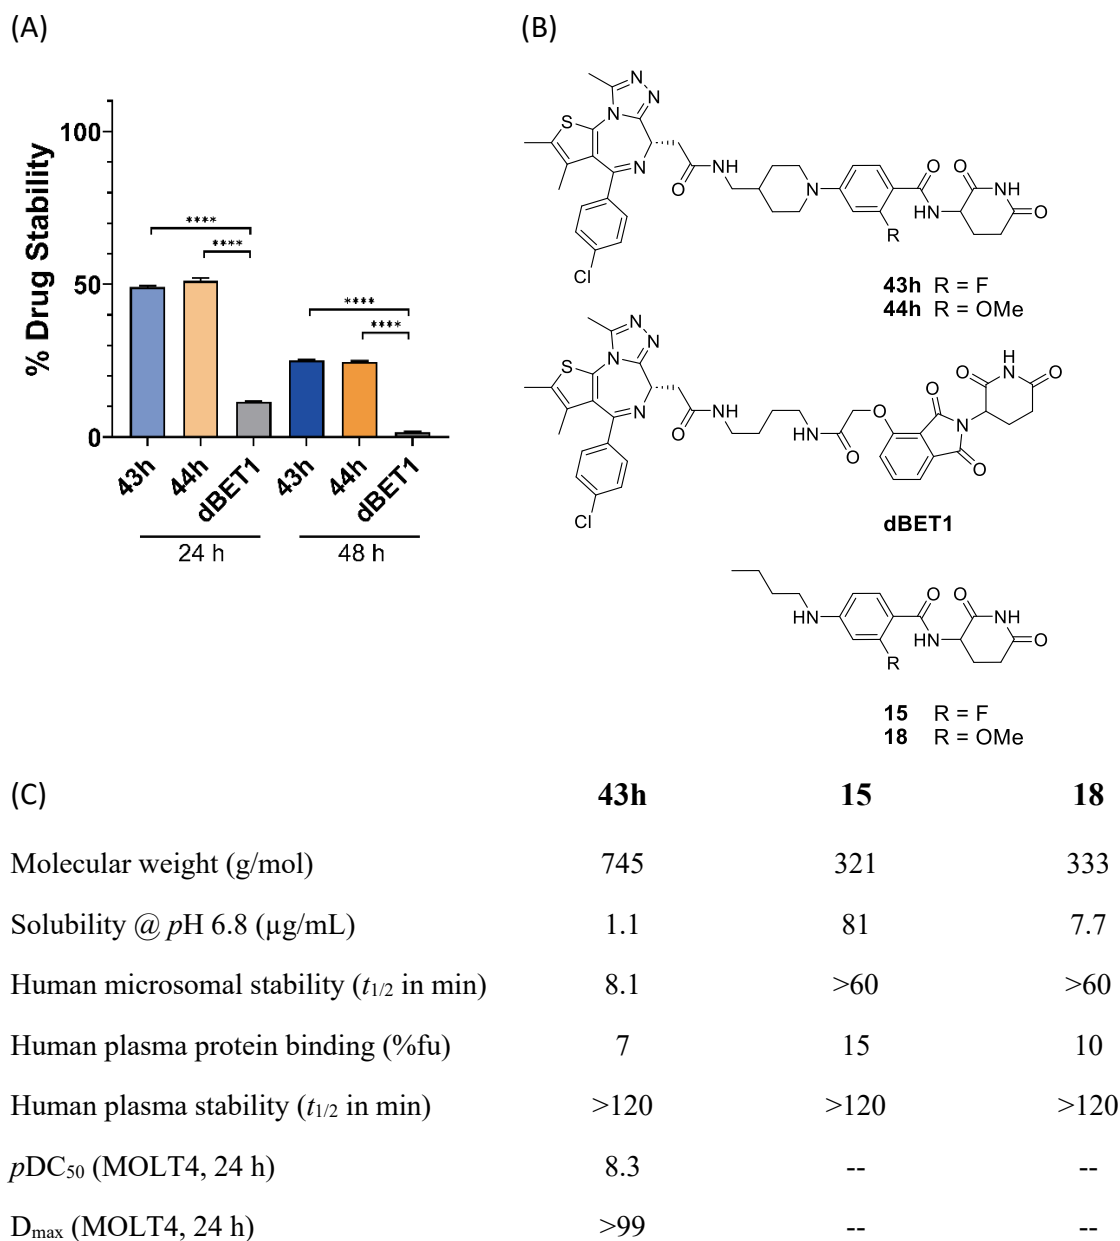

**Figure S8.** Additional physicochemical properties of selected compounds. (A) PROTAC stability data in PBS buffer pH 7.4. Acetonitrile solutions of the PROTACs were mixed with 50 mM PBS buffer and incubated for 24 or 48 hours at 37 °C. Subsequently, aliquots were analysed by HPLC and normalized to initial values at  $t = 0$  h. (B) Chemical structures of selected PROTACs and CRBN ligands along with physicochemical property profiles (C).

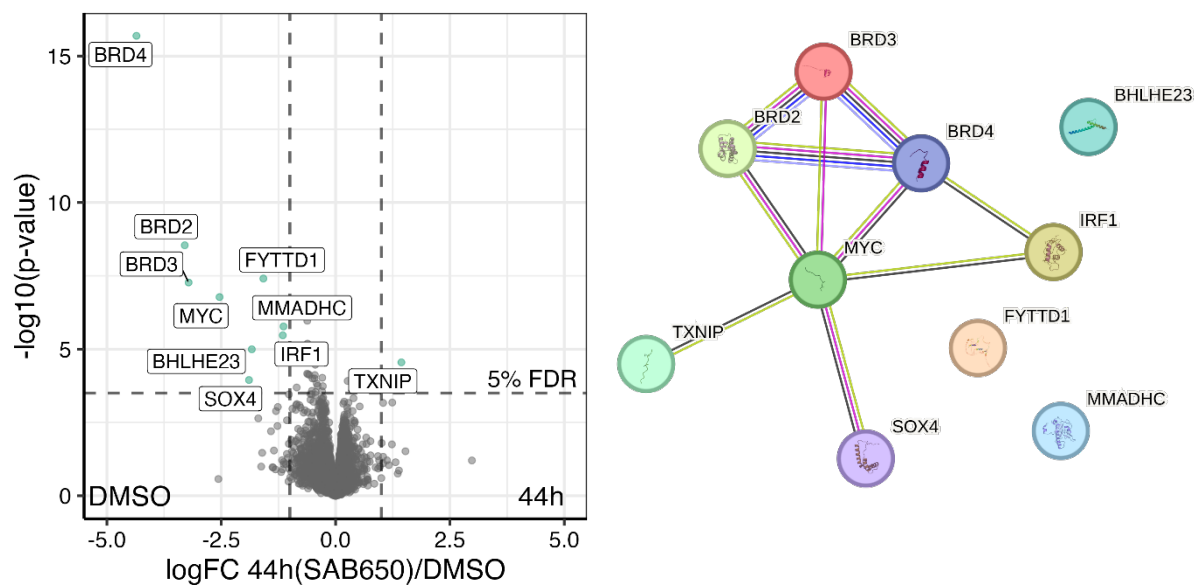

**Figure S9.** Proteins regulated by PROTAC **44h** which includes **44h** targets and downstream effects. Most regulated proteins are connected to MYC as indicated in the network graph obtained from STRING database searches.

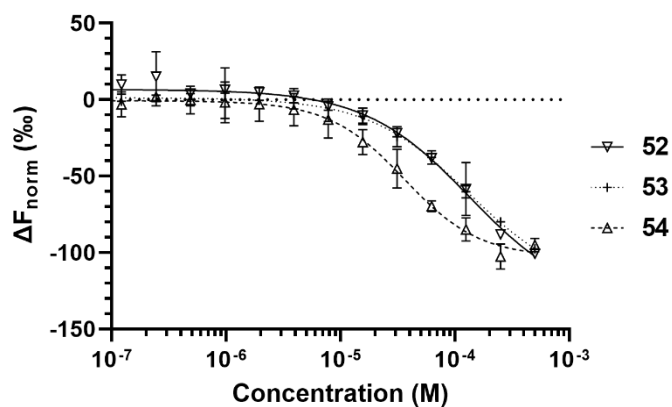

**Figure S10.** Dose-response curves for patent structures **52-54** obtained in competitive MST measurements with BODIPY-uracil and hTBD. Data is shown as mean  $\pm$  s.d. (n=3).

**Scheme S1.** Synthesis of comparators **52-54**.

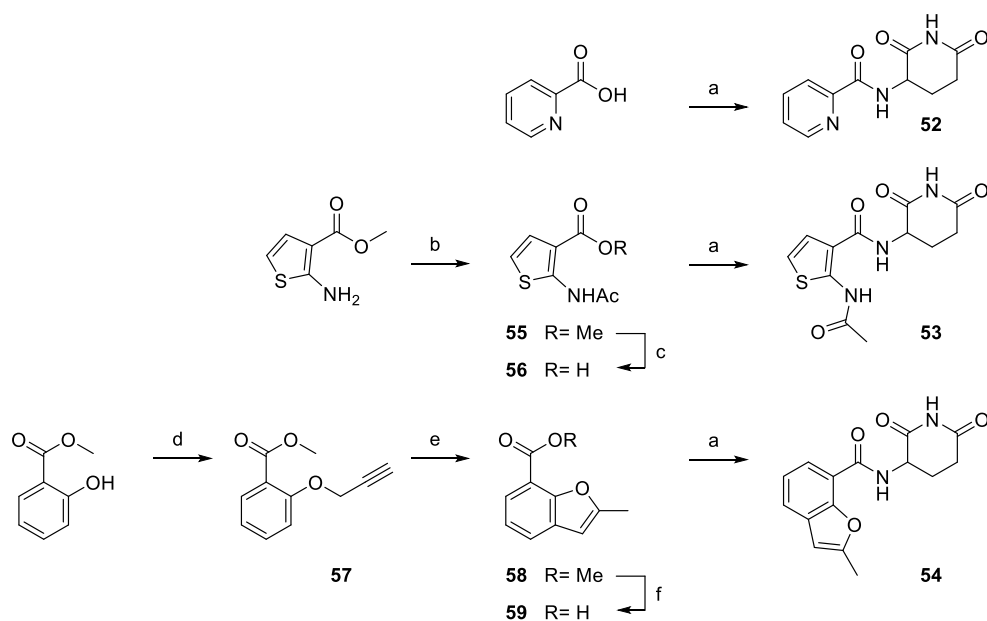

<sup>a</sup>Reagents and conditions: (a) EDC  $\times$  HCl, HOBT  $\times$  H<sub>2</sub>O, 3-aminopiperidine-2,6-dione hydrochloride, DIPEA, DMF, rt, 16 h, 12–55%; (b) Ac<sub>2</sub>O, 140 °C, 30 min, 61%; (c) KOH, MeOH, H<sub>2</sub>O, 50 °C, 16 h, 89%; (d) propargyl bromide, Cs<sub>2</sub>CO<sub>3</sub>, DMF, rt, 16 h, 88%; (e) CsF, *N,N*-diethyl aniline, 200 °C, 3 h, 15%; (f) 2M NaOH (aq), MeOH, THF, 40 °C, 6 h, 76%.

| Cmpd       | Chain A | Chain B | Chain C | VDW distance              |
|------------|---------|---------|---------|---------------------------|
| <b>8d</b>  | n/a     | 1.9 Å   | n/a     | F $\cdots$ H sum: 2.67 Å  |
| <b>11a</b> | 1.9 Å   | 1.7 Å   | n/a     | Cl $\cdots$ H sum: 2.95 Å |
| <b>11c</b> | 1.3 Å   | 1.7 Å   | n/a     | H $\cdots$ H sum: 2.4 Å   |
| <b>11d</b> | 1.9 Å   | 2.0 Å   | 1.9 Å   | O $\cdots$ H sum: 2.72 Å  |
| <b>11e</b> | 1.9 Å   | 1.9 Å   | n/a     | O $\cdots$ H sum: 2.72 Å  |
| <b>11f</b> | 1.9 Å   | 1.8 Å   | n/a     | F $\cdots$ H sum: 2.67 Å  |

**Table S1.** Sub-van der Waals distances observed for the crystallized compounds. The observed distances between the indicated atoms in the respective protein chain (A, B, or C) in the asymmetric unit of the co-crystal structures are given. n/a: no compound bound in the respective protein chain.

|                                                        | MsCI4-8d                                       | MsCI4-11a                                      | MsCI4-11b                                      | MsCI4-11c                                      | MsCI4-11d                                      | MsCI4-11e                                      | MsCI4-11f                                      |
|--------------------------------------------------------|------------------------------------------------|------------------------------------------------|------------------------------------------------|------------------------------------------------|------------------------------------------------|------------------------------------------------|------------------------------------------------|
| Wavelength (Å)                                         | 1.00                                           | 1.00                                           | 1.00                                           | 1.00                                           | 1.00                                           | 1.00                                           | 1.00                                           |
| Space group                                            | P 2 <sub>1</sub> 2 <sub>1</sub> 2 <sub>1</sub> | P 2 <sub>1</sub> 2 <sub>1</sub> 2 <sub>1</sub> | P 2 <sub>1</sub> 2 <sub>1</sub> 2 <sub>1</sub> | P 2 <sub>1</sub> 2 <sub>1</sub> 2 <sub>1</sub> | P 2 <sub>1</sub> 2 <sub>1</sub> 2 <sub>1</sub> | P 2 <sub>1</sub> 2 <sub>1</sub> 2 <sub>1</sub> | P 2 <sub>1</sub> 2 <sub>1</sub> 2 <sub>1</sub> |
| a, b, c (Å)                                            | 56.79, 59.52,<br>88.15                         | 56.51, 59.54,<br>88.19                         | 56.84, 59.57,<br>88.48                         | 56.99, 59.13,<br>87.14                         | 56.41, 59.55,<br>88.41                         | 56.33, 59.74,<br>88.31                         | 56.42, 59.47,<br>88.15                         |
| $\alpha, \beta, \gamma$ (°)                            | 90, 90, 90                                     | 90, 90, 90                                     | 90, 90, 90                                     | 90, 90, 90                                     | 90, 90, 90                                     | 90, 90, 90                                     | 90, 90, 90                                     |
| Resolution range (Å)                                   | 35.42 - 1.47<br>(1.52 - 1.47)                  | 40.99 - 2.25<br>(2.33 - 2.25)                  | 49.42 - 2.30<br>(2.38 - 2.30)                  | 37.12 - 1.84<br>(1.91 - 1.84)                  | 40.95 - 1.70<br>(1.76 - 1.70)                  | 37.17 - 1.75<br>(1.81 - 1.75)                  | 47.52 - 1.85<br>(1.92 - 1.85)                  |
| Total No. of reflections                               | 664940 (109801)                                | 188951 (30600)                                 | 179890 (28972)                                 | 340486 (54241)                                 | 430577 (61914)                                 | 312122 (50046)                                 | 300966 (28943)                                 |
| No. of unique reflections                              | 51535 (8199)                                   | 14648 (2311)                                   | 13895 (2193)                                   | 26237 (4157)                                   | 33503 (5334)                                   | 30740 (4878)                                   | 25046 (3258)                                   |
| Completeness (%)                                       | 99.97 (99.88)                                  | 99.84 (99.44)                                  | 99.97 (100.00)                                 | 99.97 (100.00)                                 | 99.98 (100.00)                                 | 99.96 (99.93)                                  | 96.37 (74.23)                                  |
| CC <sub>1/2</sub>                                      | 99.9 (66.4)                                    | 99.8 (63.1)                                    | 99.7 (58.0)                                    | 99.9 (61.8)                                    | 99.9 (61.9)                                    | 99.8 (56.9)                                    | 99.8 (58.8)                                    |
| $\langle I/\sigma(I) \rangle$                          | 15.28 (1.09)                                   | 10.68 (1.26)                                   | 10.48 (1.09)                                   | 16.62 (1.19)                                   | 14.74 (1.21)                                   | 11.33 (1.27)                                   | 11.62 (1.00)                                   |
| R <sub>meas</sub>                                      | 7.8 (200.4)                                    | 16.2 (196.6)                                   | 18.2 (255.7)                                   | 8.1 (198.1)                                    | 8.8 (177.0)                                    | 12.5 (166.4)                                   | 13.1 (159.8)                                   |
| Overall B factor from<br>Wilson plot (Å <sup>2</sup> ) | 25.33                                          | 53.08                                          | 55.36                                          | 40.11                                          | 31.65                                          | 28.12                                          | 34.42                                          |

**Table S2.** X-ray data collection and processing. Values in parentheses correspond to the outer resolution shell.

|                                     | MsCI4-8d                      | MsCI4-11a                     | MsCI4-11b                     | MsCI4-11c                     | MsCI4-11d                     | MsCI4-11e                     | MsCI4-11f                     |
|-------------------------------------|-------------------------------|-------------------------------|-------------------------------|-------------------------------|-------------------------------|-------------------------------|-------------------------------|
| Resolution range (Å)                | 35.42 - 1.47<br>(1.52 - 1.47) | 40.99 - 2.25<br>(2.33 - 2.25) | 49.42 - 2.30<br>(2.38 - 2.30) | 37.12 - 1.84<br>(1.91 - 1.84) | 40.95 - 1.70<br>(1.76 - 1.70) | 37.17 - 1.75<br>(1.81 - 1.75) | 47.52 - 1.85<br>(1.92 - 1.85) |
| Completeness (%)                    | 99.97 (99.88)                 | 99.84 (99.44)                 | 99.97 (100.00)                | 99.97 (100.00)                | 99.98 (100.00)                | 99.96 (99.93)                 | 96.37 (74.23)                 |
| Final R <sub>cryst</sub>            | 0.19 (0.34)                   | 0.20 (0.34)                   | 0.18 (0.33)                   | 0.18 (0.33)                   | 0.17 (0.34)                   | 0.18 (0.33)                   | 0.18 (0.35)                   |
| Final R <sub>free</sub>             | 0.22 (0.34)                   | 0.27 (0.31)                   | 0.26 (0.36)                   | 0.21 (0.35)                   | 0.21 (0.36)                   | 0.22 (0.30)                   | 0.23 (0.36)                   |
| No. of non-H atoms                  |                               |                               |                               |                               |                               |                               |                               |
| Total                               | 2473                          | 2267                          | 2308                          | 2126                          | 2475                          | 2562                          | 2503                          |
| Protein                             | 2288                          | 2208                          | 2237                          | 2010                          | 2325                          | 2412                          | 2373                          |
| Ligand                              | 75                            | 41                            | 47                            | 61                            | 63                            | 60                            | 52                            |
| Solvent                             | 110                           | 18                            | 24                            | 55                            | 87                            | 90                            | 78                            |
| R.m.s. deviations                   |                               |                               |                               |                               |                               |                               |                               |
| Bond lengths (Å)                    | 0.011                         | 0.008                         | 0.016                         | 0.010                         | 0.009                         | 0.009                         | 0.009                         |
| Angles (°)                          | 1.57                          | 1.30                          | 2.15                          | 1.48                          | 1.47                          | 1.46                          | 1.38                          |
| Average B factors (Å <sup>2</sup> ) |                               |                               |                               |                               |                               |                               |                               |
| Overall                             | 23.1                          | 44.2                          | 38.2                          | 35.2                          | 28.6                          | 35.5                          | 29.5                          |
| Protein                             | 22.0                          | 43.9                          | 37.7                          | 34.1                          | 27.8                          | 35.0                          | 28.7                          |
| Ligand                              | 34.2                          | 53.7                          | 50.2                          | 53.8                          | 31.3                          | 39.0                          | 39.9                          |
| Solvent                             | 38.2                          | 61.9                          | 60.0                          | 54.6                          | 47.8                          | 45.4                          | 49.0                          |
| Ramachandran plot statistics        |                               |                               |                               |                               |                               |                               |                               |
| Most favoured (%)                   | 97.56                         | 98.58                         | 96.80                         | 99.61                         | 97.60                         | 97.7                          | 98.3                          |
| Allowed (%)                         | 2.44                          | 1.42                          | 2.85                          | 0.39                          | 2.41                          | 2.30                          | 1.68                          |
| Ligand bound in chain(s)            | A, B, C                       | A, B                          | A, B                          | A, B                          | A, B, C                       | A, B, C                       | A, B                          |

**Table S3.** X-ray structure solution and refinement. Values in parentheses correspond to the outer resolution shell.

## Synthetic Procedures for Compounds 55-59

*Methyl 2-acetamidothiophene-3-carboxylate (55)*. Methyl 2-aminothiophene-3-carboxylate (1.57 g, 10 mmol) was dissolved in Ac<sub>2</sub>O (5 mL) and heated to 135 °C for 10 min in a flask open to air. After cooling, it was poured onto H<sub>2</sub>O (100 mL) and EtOAc (100 mL), and the mixture was vigorously stirred at rt for 1 h. The organic layer was separated and washed with brine (50 mL), dried over Na<sub>2</sub>SO<sub>4</sub>, filtered, and concentrated *in vacuo*. The crude product was purified by FC (80 g, 30 μm, gradient from 20 to 50% EtOAc/cyclohexane) to give a colorless solid. Yield: 1.21 g (61%); mp 94-96 °C, lit. mp 96-97 °C;<sup>2</sup> *R*<sub>f</sub> = 0.68 (60% EtOAc in cyclohexane); <sup>1</sup>H NMR (500 MHz, DMSO-*d*<sub>6</sub>) δ 2.16 (s, 3H), 3.83 (s, 3H), 7.86 (d, *J* = 5.4 Hz, 1H), 7.89 – 7.94 (m, 1H), 9.96 (s, 1H); <sup>13</sup>C NMR (126 MHz, DMSO-*d*<sub>6</sub>) δ 24.10, 52.13, 110.22, 122.35, 132.95, 143.98, 163.49, 167.75; LC-MS (ESI) (90% H<sub>2</sub>O to 100% MeCN in 10 min, then 100% MeCN to 20 min, DAD 220-600 nm), *t*<sub>R</sub> = 4.67 min, 99% purity, *m/z* [M + H]<sup>+</sup> calcd for C<sub>8</sub>H<sub>10</sub>NO<sub>3</sub>S, 200.04; found, 200.1.

*2-Acetamidothiophene-3-carboxylic acid (56)*. Compound **55** (1.20 g, 6.0 mmol) was dissolved in MeOH (20 mL), and KOH (0.60 g, 10.8 mmol) in H<sub>2</sub>O (10 mL) was added. The mixture was stirred at 50 °C for 16 h. After cooling, it was diluted with H<sub>2</sub>O (100 mL), and the aqueous layer was washed with EtOAc (100 mL). Subsequently, the aqueous solution was acidified with 2N HCl until *pH* = 2, and it was extracted with EtOAc (2 × 50 mL). The combined organic layers were washed with brine (50 mL), dried over Na<sub>2</sub>SO<sub>4</sub>, filtered, and concentrated *in vacuo* to give a colorless solid. Yield: 0.99 g (89%); mp 222 °C (dec); *R*<sub>f</sub> = 0.45 (10% MeOH/CH<sub>2</sub>Cl<sub>2</sub>); <sup>1</sup>H NMR (600 MHz, DMSO-*d*<sub>6</sub>) δ 2.14 (s, 3H), 7.80 (d, *J* = 5.4 Hz, 1H), 7.92 (d, *J* = 5.4 Hz, 1H), 10.11 (s, 1H), 13.37 (s, 1H); <sup>13</sup>C NMR (151 MHz, DMSO-*d*<sub>6</sub>) δ 24.26, 111.40, 122.17, 132.24, 143.73, 164.97, 167.63; LC-MS (ESI) (90% H<sub>2</sub>O to 100% MeCN in 10 min, then 100% MeCN to 20 min, DAD 220-600 nm), *t*<sub>R</sub> = 0.31 min, 99% purity, *m/z* [M + H]<sup>+</sup> calcd for C<sub>7</sub>H<sub>8</sub>NO<sub>3</sub>S, 186.02; found, 185.9.

*Methyl 2-prop-2-ynoxybenzoate (57)*. This compound was synthesized as reported previously.<sup>3</sup> In brief, methyl salicylate (3.04 g, 20 mmol) and Cs<sub>2</sub>CO<sub>3</sub> (6.52 g, 24 mmol) were suspended in dry DMF (20 mL) and stirred at rt for 10 min. Subsequently, propargyl bromide (9.2 mol/L solution in toluene, 2.8 mL, 26 mmol) was added, and the mixture was stirred at rt for 16 h. It was then quenched with H<sub>2</sub>O (100 mL) and extracted with EtOAc (2 × 100 mL). The combined organic layers were washed with 5% LiCl solution and brine (100 mL), dried over Na<sub>2</sub>SO<sub>4</sub>, filtered, and concentrated *in vacuo*. The crude product was purified by FC (120 g, 50 μm, gradient from 0 to 40% EtOAc/cyclohexane) to give a colorless oil. Yield: 3.36 g

(88%);  $R_f = 0.54$  (30% EtOAc in cyclohexane);  $^1\text{H NMR}$  (500 MHz,  $\text{DMSO-}d_6$ )  $\delta$  3.57 (t,  $J = 2.4$  Hz, 1H), 3.78 (s, 3H), 4.87 (d,  $J = 2.5$  Hz, 2H), 7.01 – 7.09 (m, 1H), 7.21 (d,  $J = 8.3$  Hz, 1H), 7.50 – 7.57 (m, 1H), 7.65 (dd,  $J = 1.8, 7.6$  Hz, 1H);  $^{13}\text{C NMR}$  (126 MHz,  $\text{DMSO-}d_6$ )  $\delta$  52.00, 56.35, 78.63, 79.02, 114.45, 121.07, 121.10, 130.79, 133.27, 156.10, 166.12; LC-MS (ESI) (90%  $\text{H}_2\text{O}$  to 100% MeCN in 10 min, then 100% MeCN to 20 min, DAD 220-600 nm),  $t_R = 5.33$  min, 99% purity,  $m/z$   $[\text{M} + \text{H}]^+$  calcd for  $\text{C}_{11}\text{H}_{11}\text{O}_3$ , 191.07; found, 191.1.

*Methyl 2-methylbenzofuran-7-carboxylate (58)*. This compound was synthesized as reported previously.<sup>3</sup> Compound **57** (1.90 g, 10 mmol) was dissolved in *N,N*-diethylaniline (10 mL) and cesium fluoride (1.97 g, 13 mmol) was added. The mixture was stirred at 200 °C for 3 h. After cooling, the brown mixture was directly loaded onto a silica gel column equilibrated with *n*-hexanes. The product was then eluted from the column with 20% EtOAc in *n*-hexanes. Product-enriched fractions were pooled and subjected to FC (80 g, 30  $\mu\text{m}$ , gradient from 0 to 20% EtOAc/*n*-hexanes) to give a yellow oil. Yield: 0.29 g (15%);  $R_f = 0.60$  (20% EtOAc in cyclohexane);  $^1\text{H NMR}$  (500 MHz,  $\text{DMSO-}d_6$ )  $\delta$  2.48 (s, 3H), 3.90 (s, 3H), 6.68 (d,  $J = 1.2$  Hz, 1H), 7.29 (t,  $J = 7.7$  Hz, 1H), 7.72 – 7.82 (m, 2H);  $^{13}\text{C NMR}$  (126 MHz,  $\text{DMSO-}d_6$ )  $\delta$  13.88, 52.16, 102.87, 113.99, 122.58, 125.21, 125.56, 130.80, 152.36, 156.78, 164.78; LC-MS (ESI) (90%  $\text{H}_2\text{O}$  to 100% MeCN in 10 min, then 100% MeCN to 20 min, DAD 220-600 nm),  $t_R = 6.20$  min, 98% purity,  $m/z$   $[\text{M} + \text{H}]^+$  calcd for  $\text{C}_{11}\text{H}_{11}\text{O}_3$ , 191.07; found, 191.1.

*2-Methylbenzofuran-7-carboxylic acid (59)*. Compound **58** (285 mg, 1.5 mmol) was dissolved in THF (3 mL) and MeOH (0.5 mL), after which aqueous 2N NaOH (1.5 mL) was added. The mixture was stirred at 40 °C for 6 h. It was diluted with  $\text{H}_2\text{O}$  (50 mL), acidified with 2N HCl until  $\text{pH} = 2$ , and it was extracted with EtOAc ( $2 \times 50$  mL). The combined organic layers were washed with brine (50 mL), dried over  $\text{Na}_2\text{SO}_4$ , filtered, and concentrated *in vacuo* to give a colorless solid, which was used in the next step without further purification. Yield: 0.20 g (76%);  $R_f = 0.46$  (EtOAc).

## Materials and Methods Proteomics

*Sample Preparation.* Cell pellets were lysed with 8M urea lysis buffer for 15 min at 4 °C (8M urea, 50 mM Tris pH 8, 150 mM NaCl, 1 mM 2-chloroacetamide), supplemented with protease inhibitors (2 µg/ml aprotinin, 10 µg/ml leupeptin, 1 mM phenylmethylsulfonyl fluoride) as described before.<sup>4</sup> Lysates were then clarified by centrifugation (20,000g, 15 min, 4°C). Disulfide bonds were reduced (5 mM dithiothreitol for 1 h) and alkylated (40 mM chloroacetamide for 45 min in the dark). Afterwards samples were diluted 1 : 4 with 50 mM Tris-HCl pH 8 and digested using sequencing grade LysC (Wako Chemicals) for 2 h in weight-to-weight ratio of 1 : 50. Finally sequencing grade trypsin (Promega) was added at a weight-to-weight ratio of 1 : 50, and digestion was carried out overnight. Samples were acidified with formic acid (FA) followed by centrifugation (20,000g, 15 min). The supernatant was further processed using Sep-Pak C18 cc Cartridges (Waters) for desalting.

*Mass Spectrometry.* For the LC/MS analysis, 1 µg of desalted peptides was utilized for each sample. Peptide were separated on a Vanquish Neo System (Thermo Fisher) with a gradient lasting 106 min and a flow rate of 250 µL/min. The mobile phase B was gradually increased from 4% to 20% over the first 67 min, then to 30% over the next 20 min, followed by 60% for 10 min, 90% for 5 min, and finally 0% for 2 min. MS data was acquired on an Exploris 480 (Thermo Fisher) using data-independent acquisition (DIA) mode. Full scans were obtained at a resolution of 120,000, scanning a range of 350–1650 *m/z*. The maximum injection time (IT) was set at 20 ms, with an automatic gain control (AGC) target value of 3e6. Subsequent to the full scan, narrow isolation windows were used, covering the range of 375-1430 *m/z* with isolation windows ranging from 14 to 440 acquired at 30,000 resolution. The fixed first mass was set at 200 *m/z*, with an AGC target value of 300e6 (3000%), and a maximum IT of 54 ms. The normalized collision energy was set in stepped mode at 26%, 29%, and 32%. Dynamic exclusion was employed for 30 s, and ions with charge states of 1, 6, or higher were excluded from fragmentation.

*Proteomics Data Analysis.* Raw data was searched using DIA-NN 1.8.1 software against the human UniProt reference proteome.<sup>5</sup> Library-free mode was used, with the in silico FASTA digest parameter enabled. The peptide length range was set to 7-30, and the precursor charge range was set to 1-4. The *m/z* range for precursors was 340-1650, and for fragment ions, it was 200-1800. The 'match between runs' parameter was enabled. LFQ protein intensities from the DIA-NN pg output table were log<sub>2</sub> transformed, filtered for valid values (> 70%) and contaminants. The resulting intensities were median normalized, and missing values were



imputed from a normal distribution with a downshift (-1.8 SD from the mean and the distribution width is 0.3 SD). Comparative analysis of experimental groups was conducted using a two-sided moderated two-sample t-test. The resulting p-values were corrected using the Benjamini-Hochberg method. The data analysis was performed using R (4.3.1).

## Selected NMR and LC/MS Data

### $^1\text{H}$ and $^{13}\text{C}$ NMR spectrum of compound **8d**

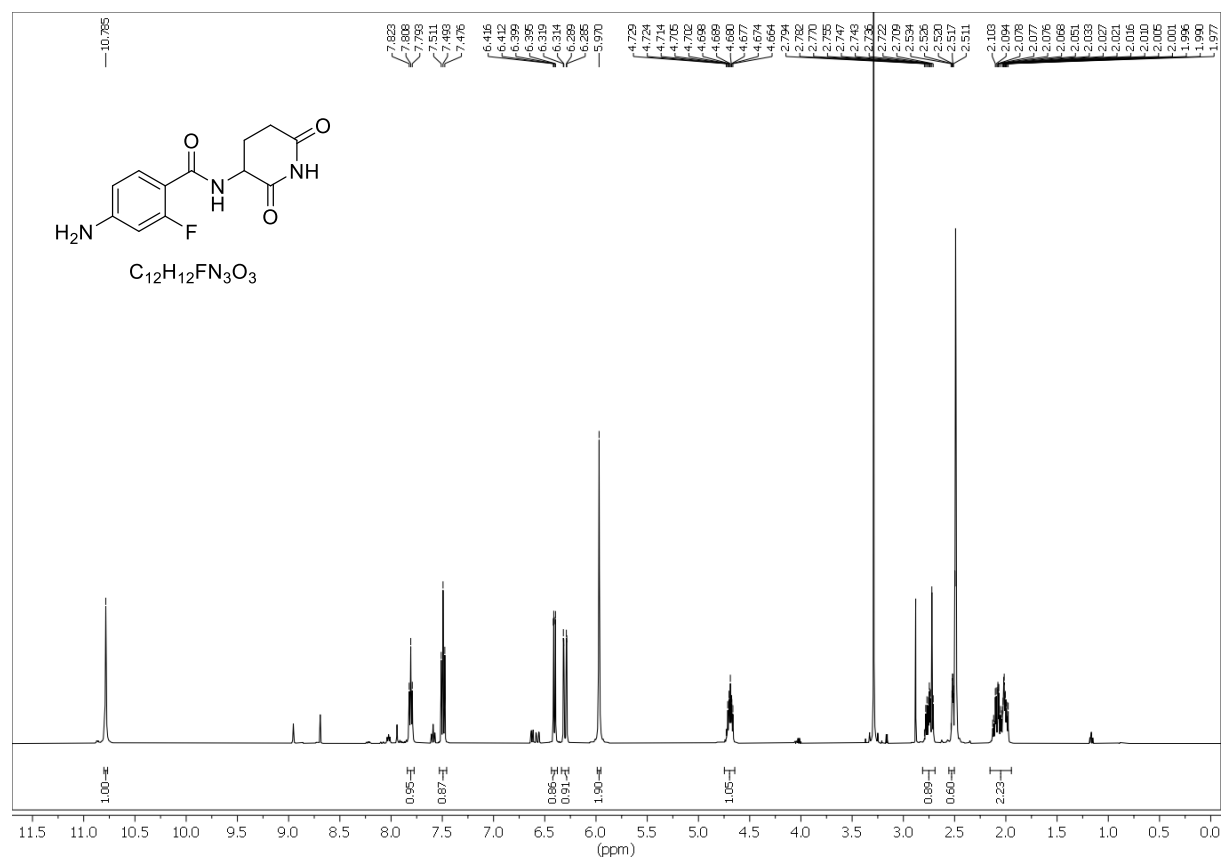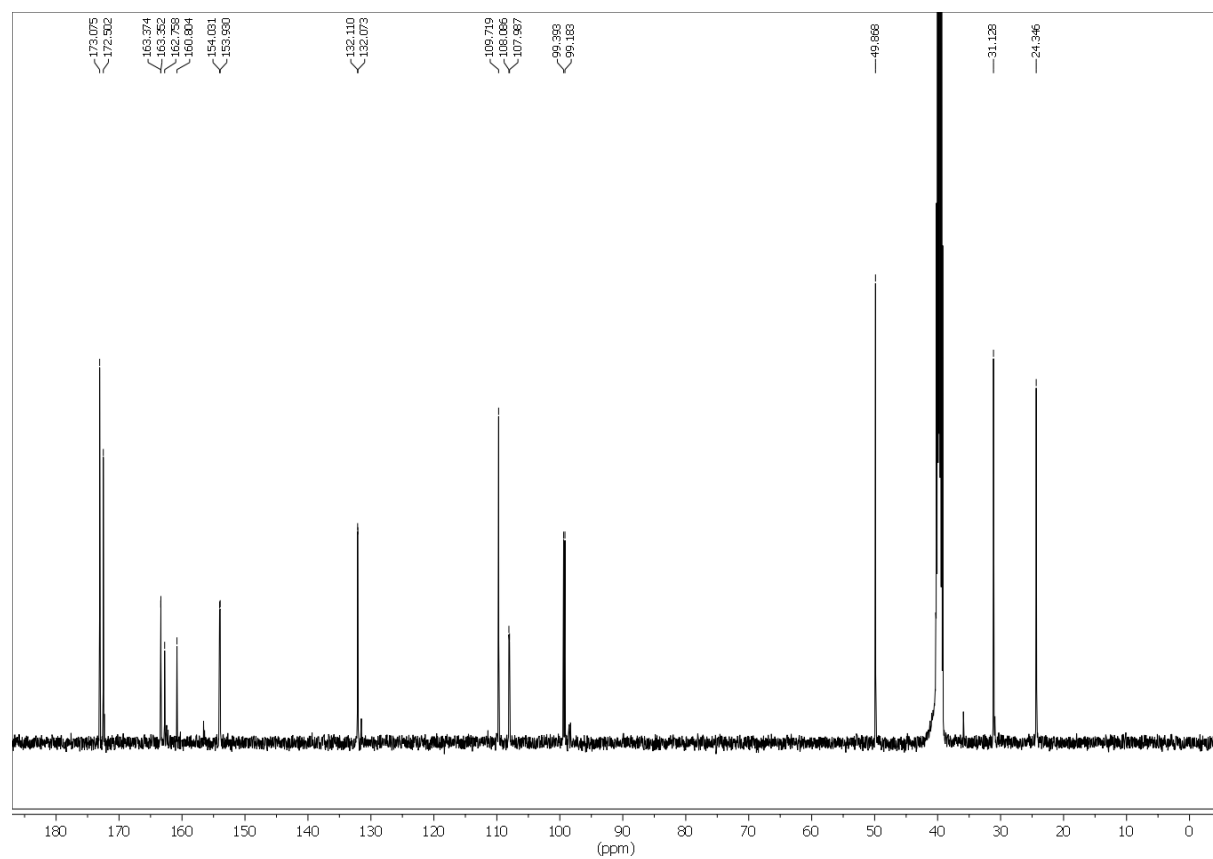

# $^1\text{H}$ and $^{13}\text{C}$ NMR spectrum of compound **11a**

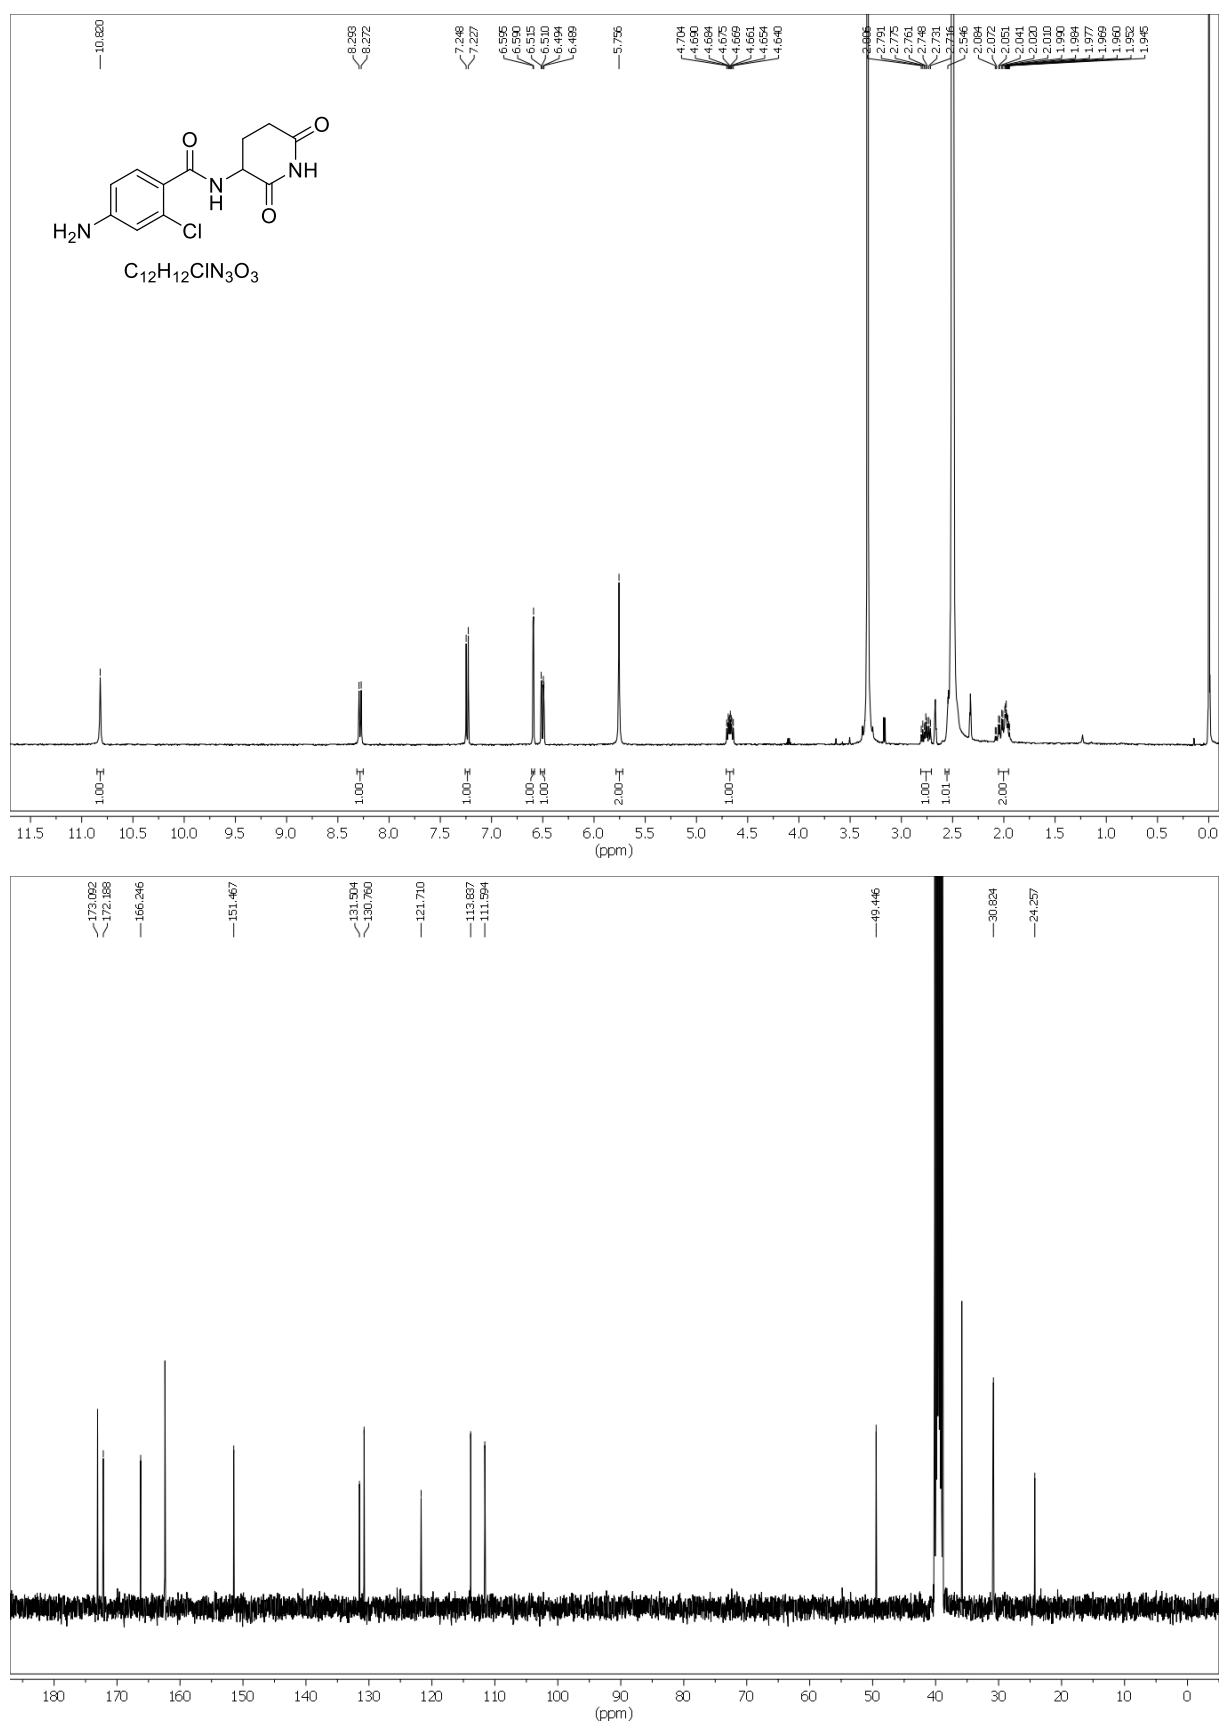

# <sup>1</sup>H and <sup>13</sup>C NMR spectrum of compound **11b**

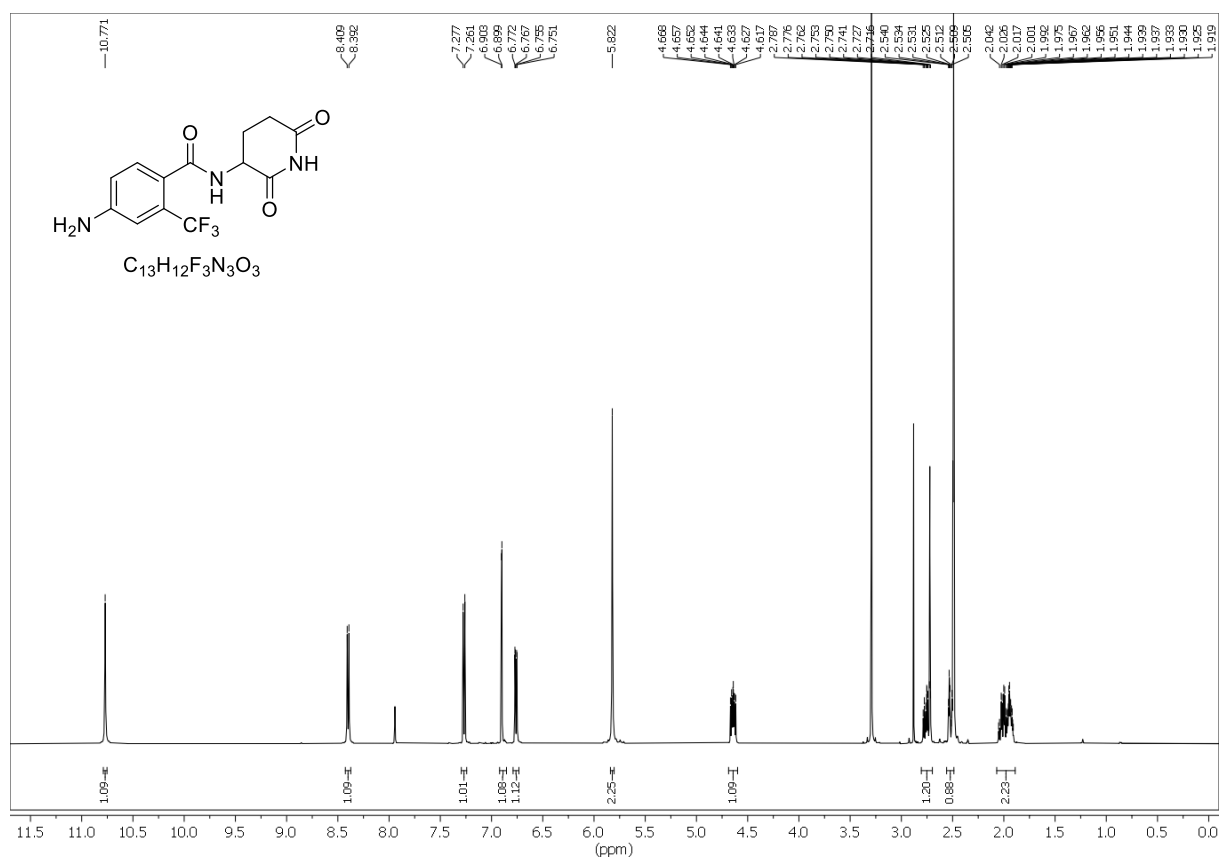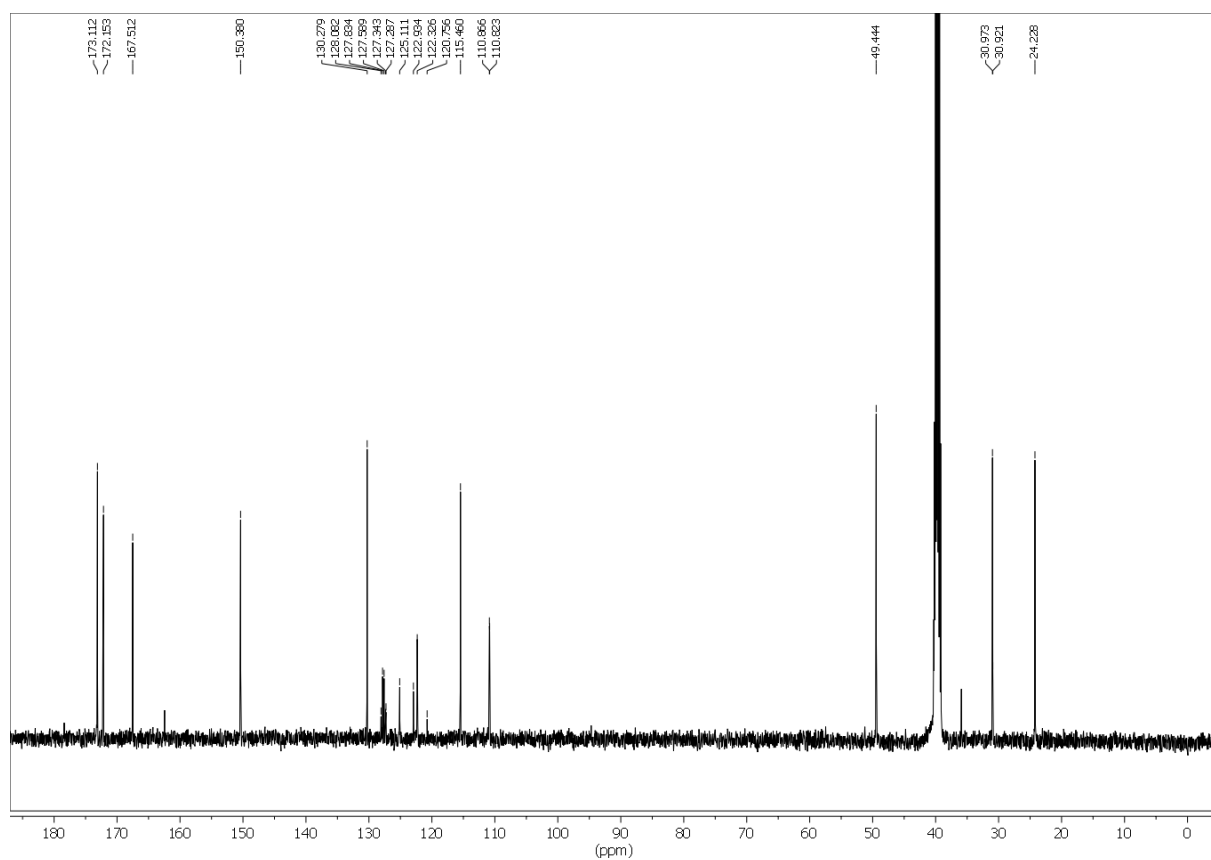

# $^1\text{H}$ and $^{13}\text{C}$ NMR spectrum of compound **11c**

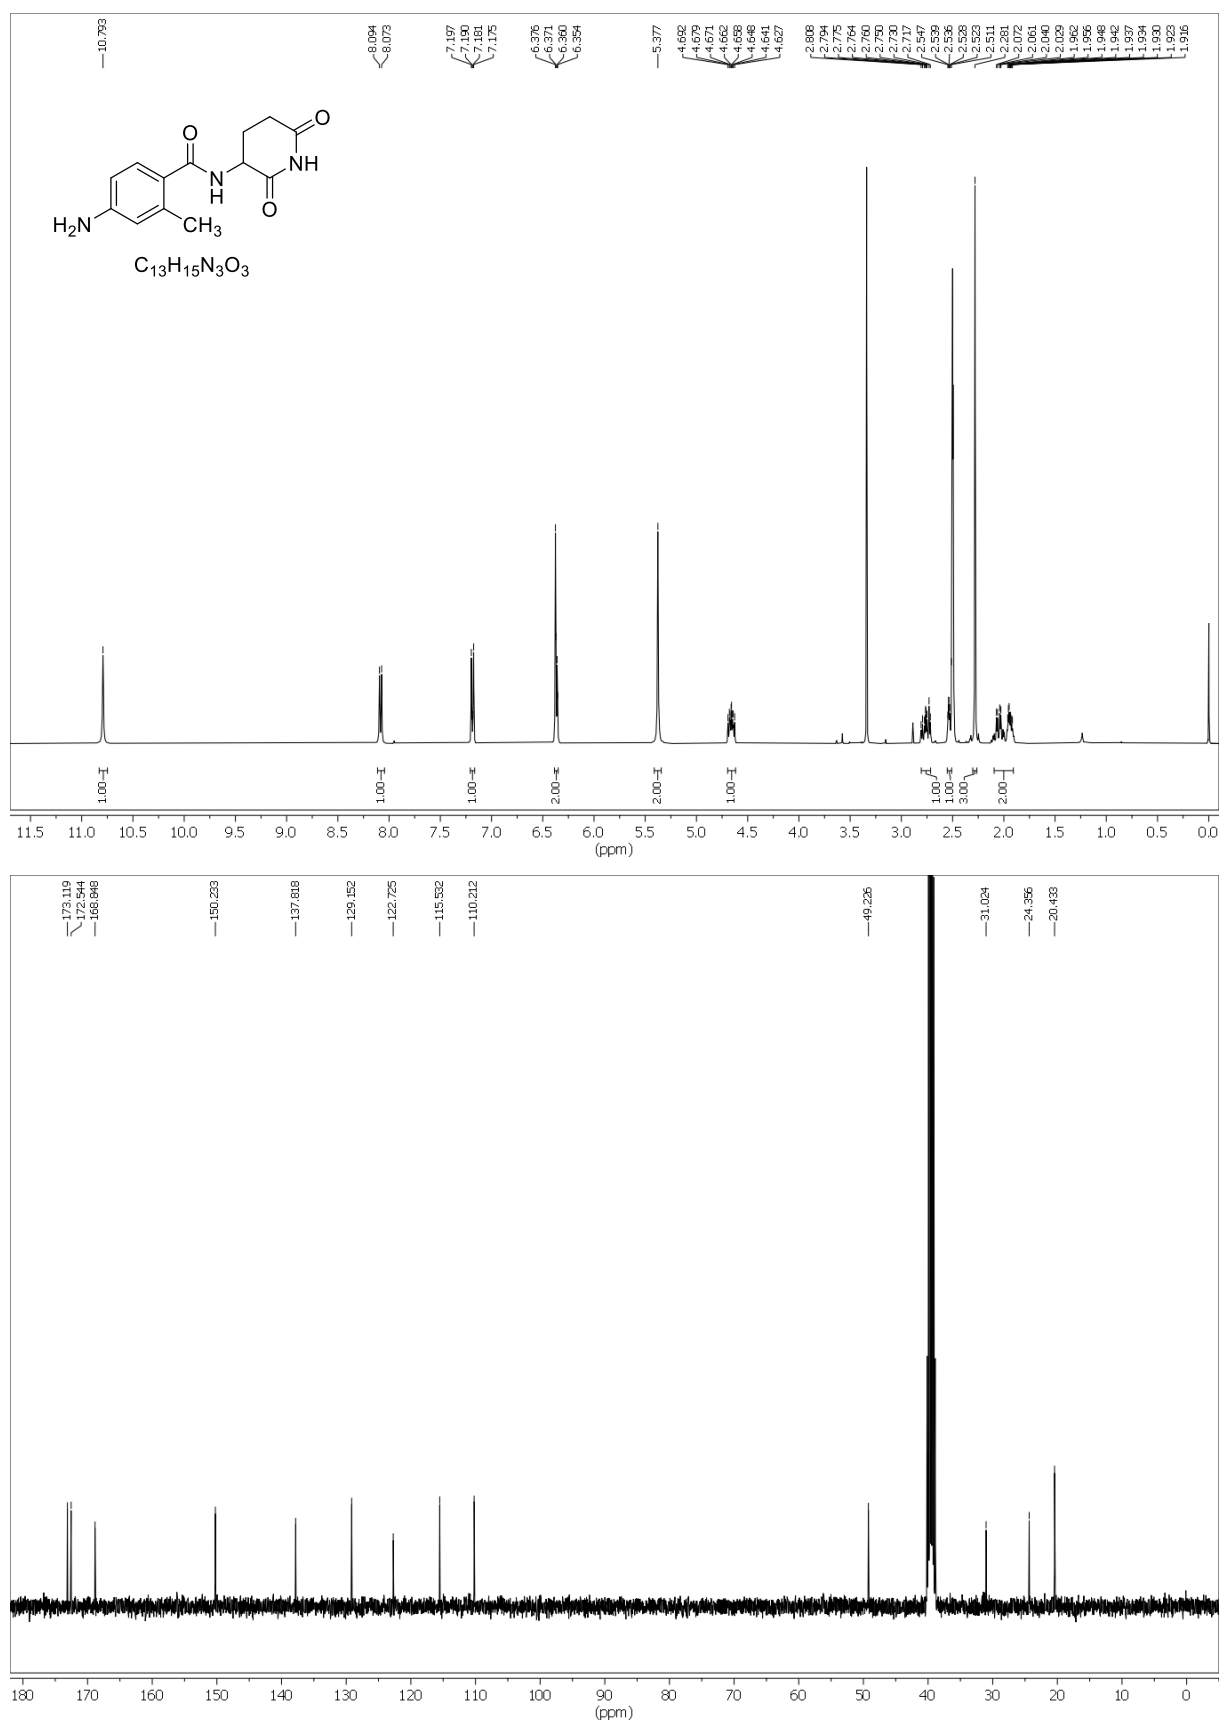

$^1\text{H}$  and  $^{13}\text{C}$  NMR spectrum of compound **11d**

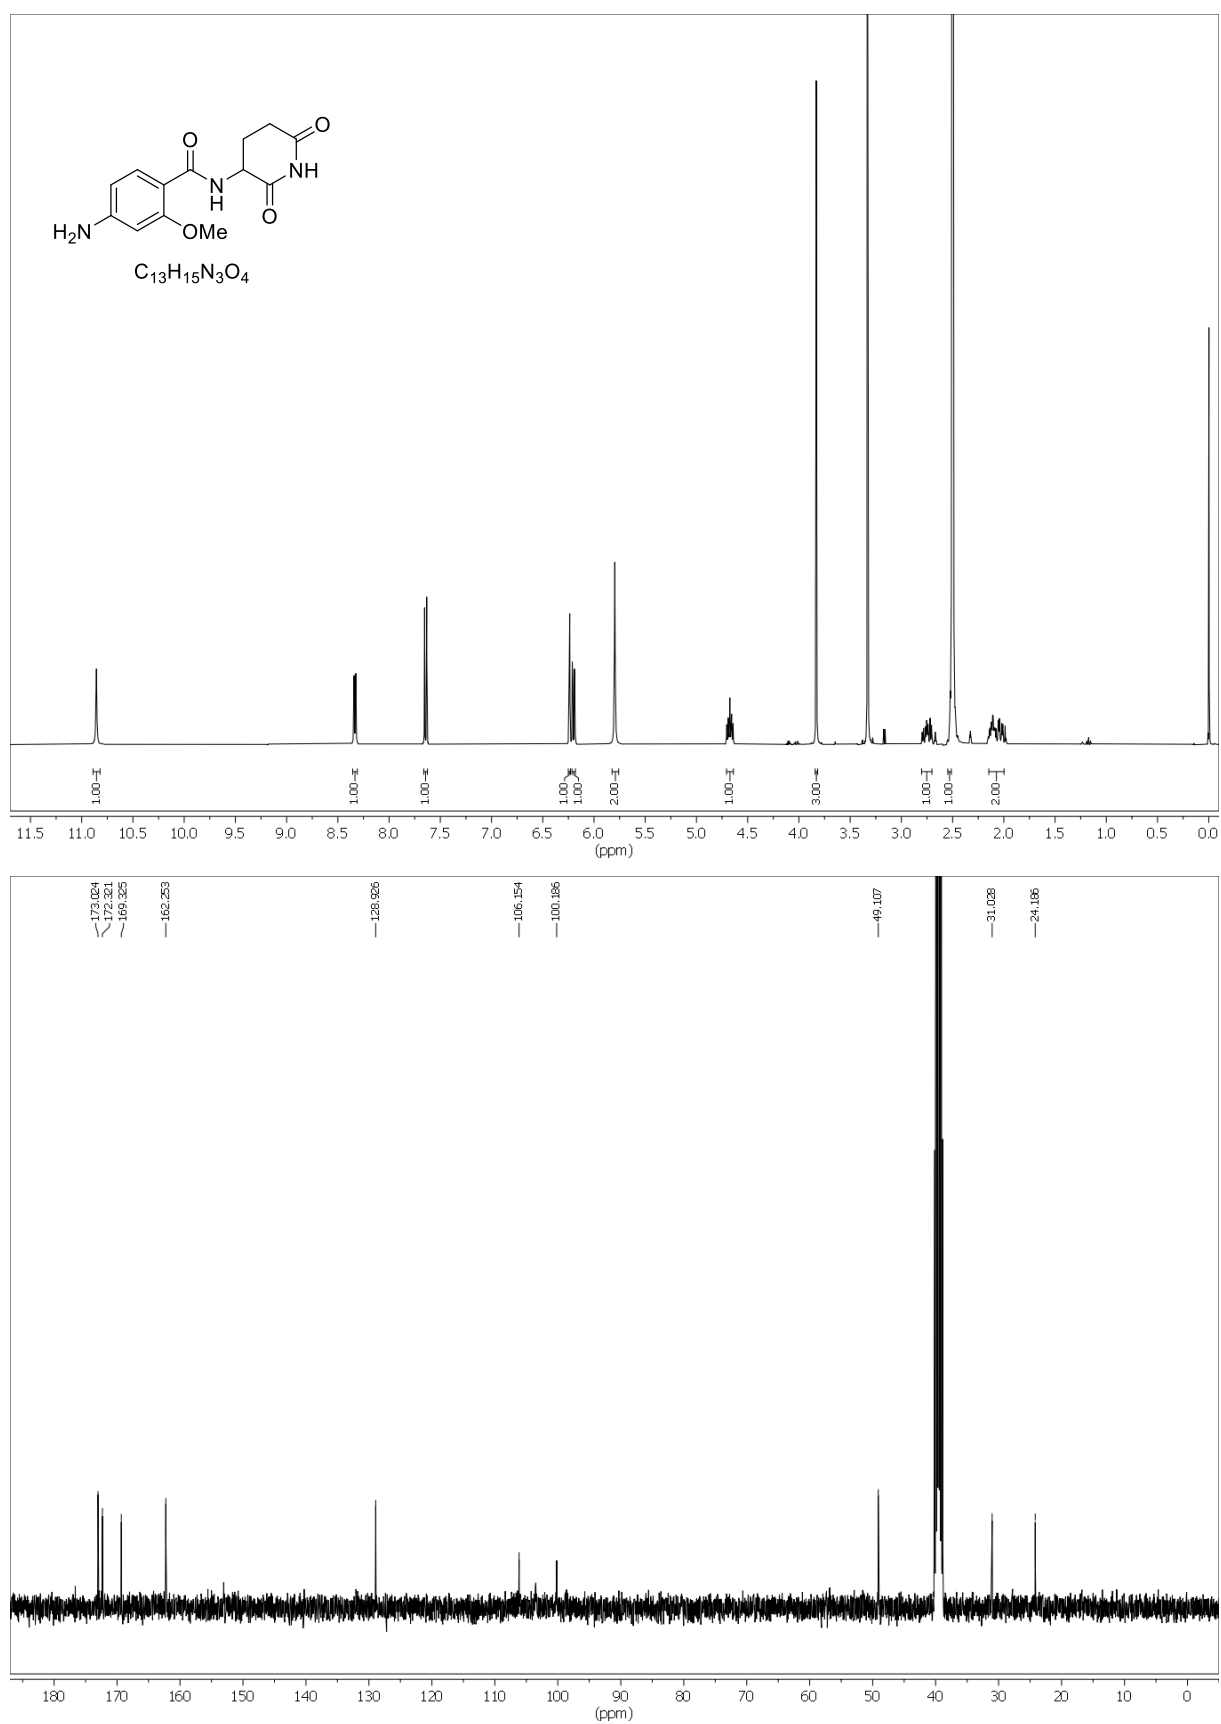

$^1\text{H}$  and  $^{13}\text{C}$  NMR spectrum of compound **11e**

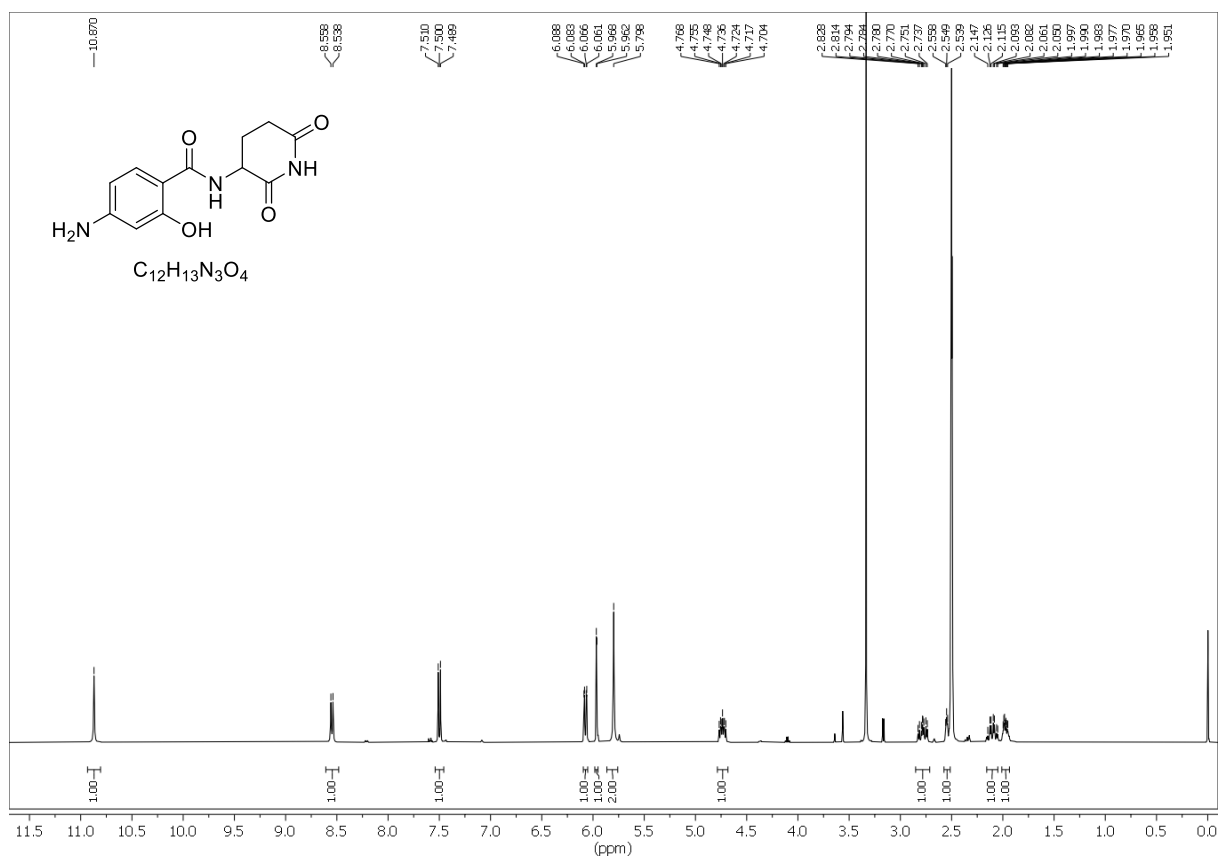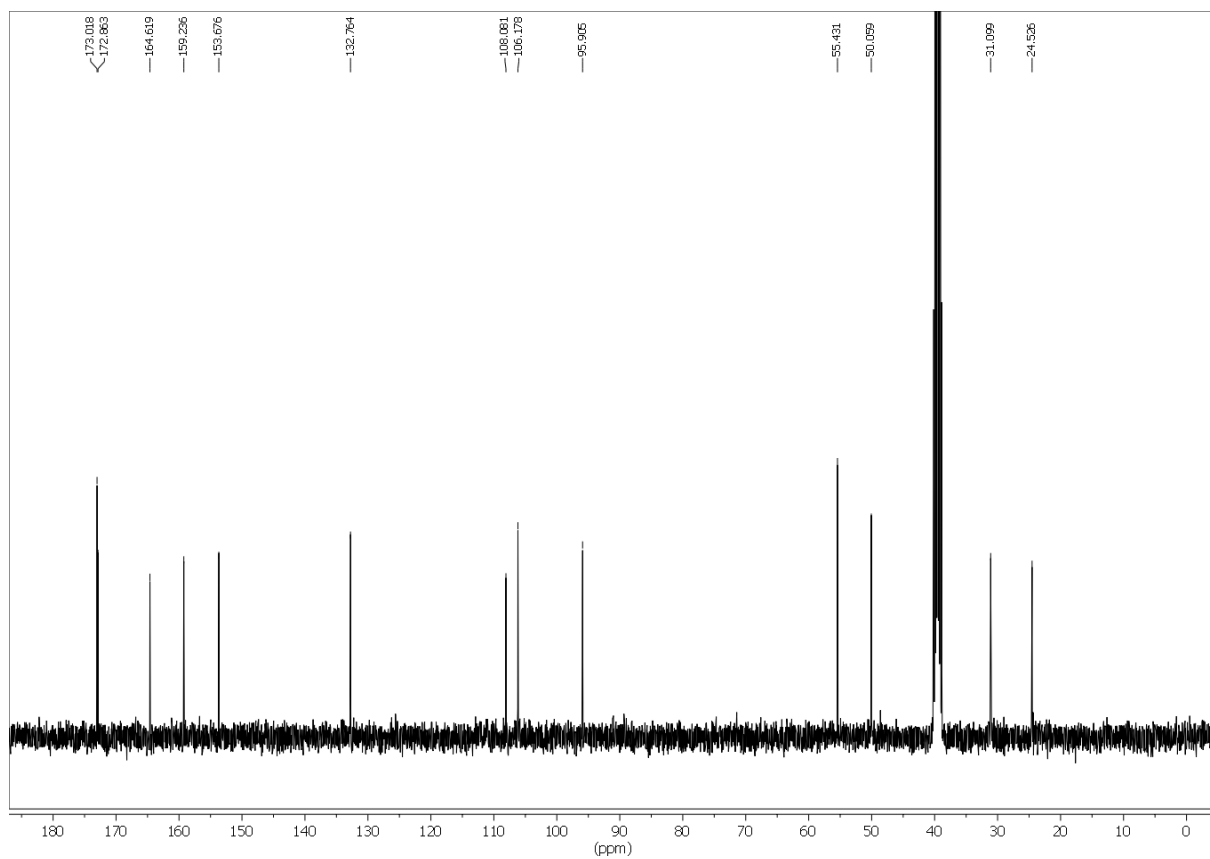

$^1\text{H}$  and  $^{13}\text{C}$  NMR spectrum of compound **11f**

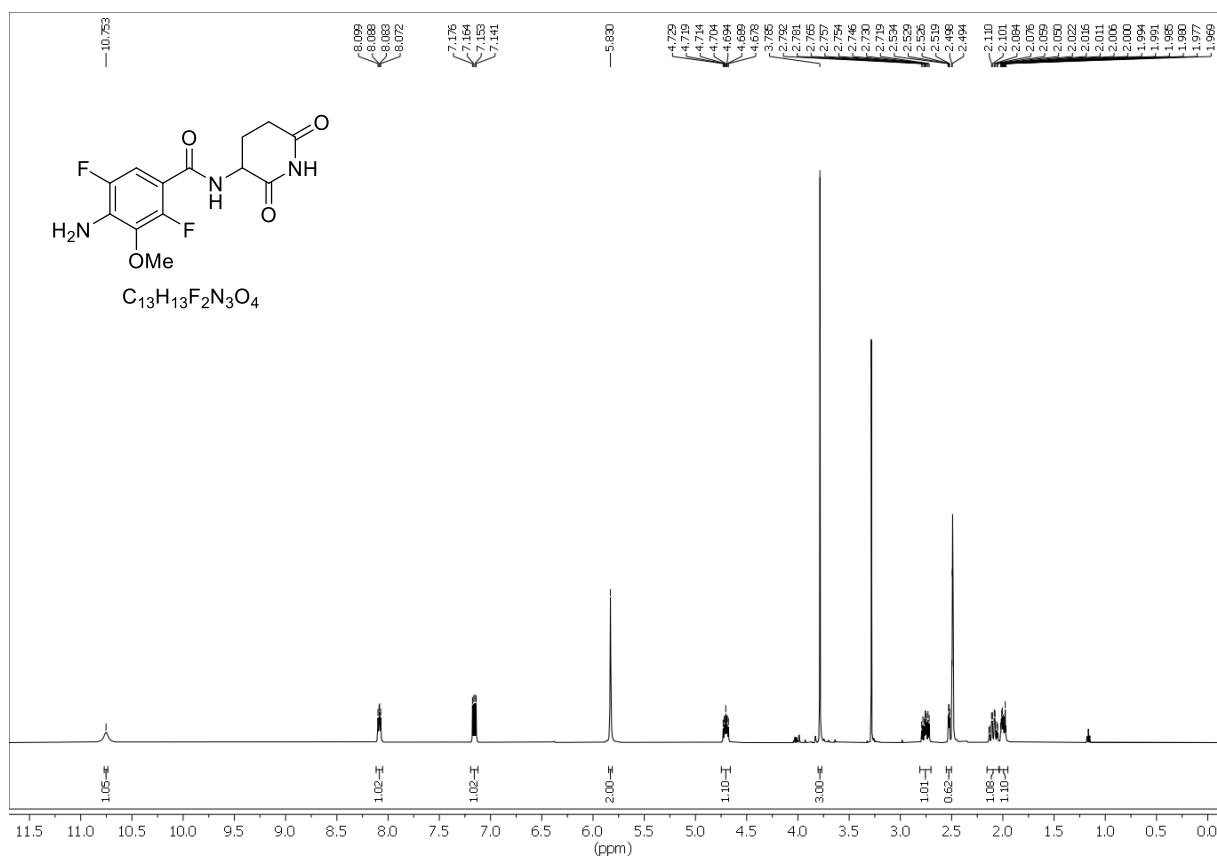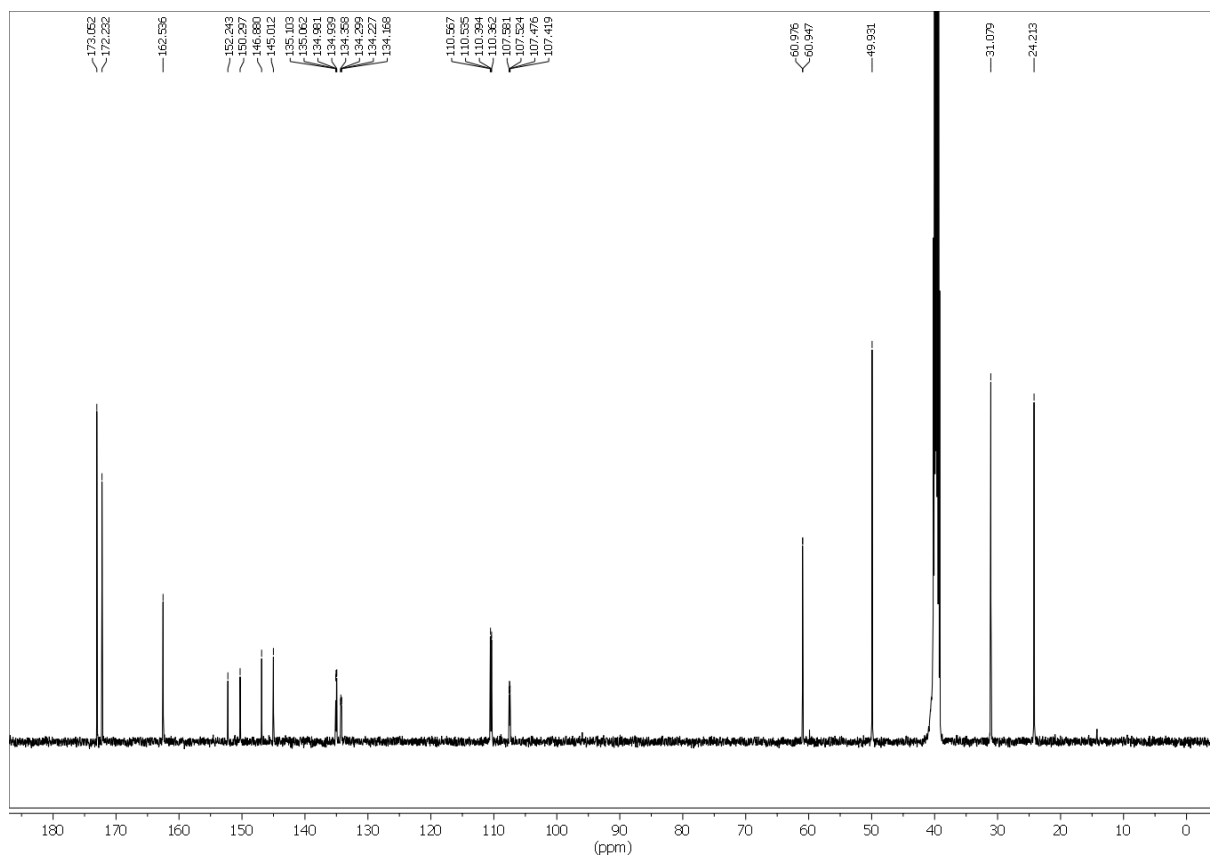



$^1\text{H}$  and  $^{13}\text{C}$  NMR spectrum of compound **40h**

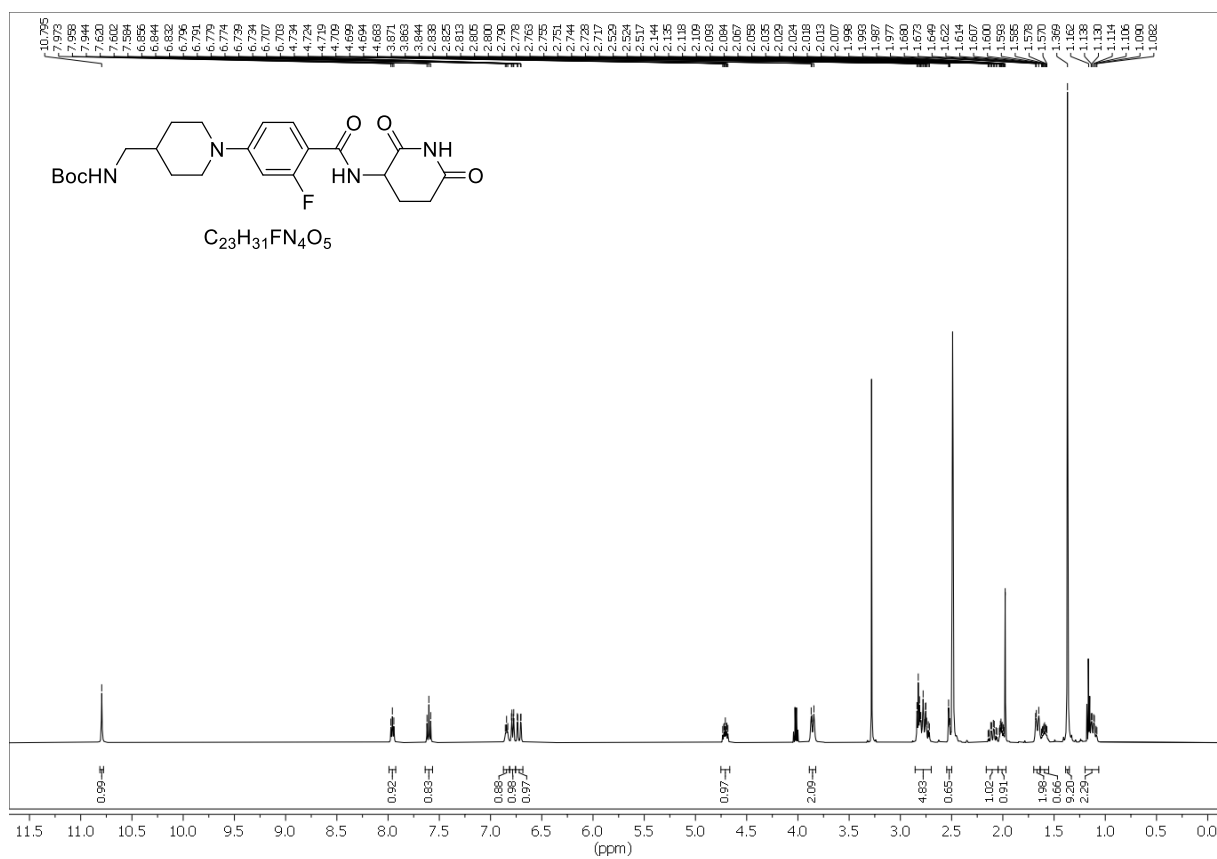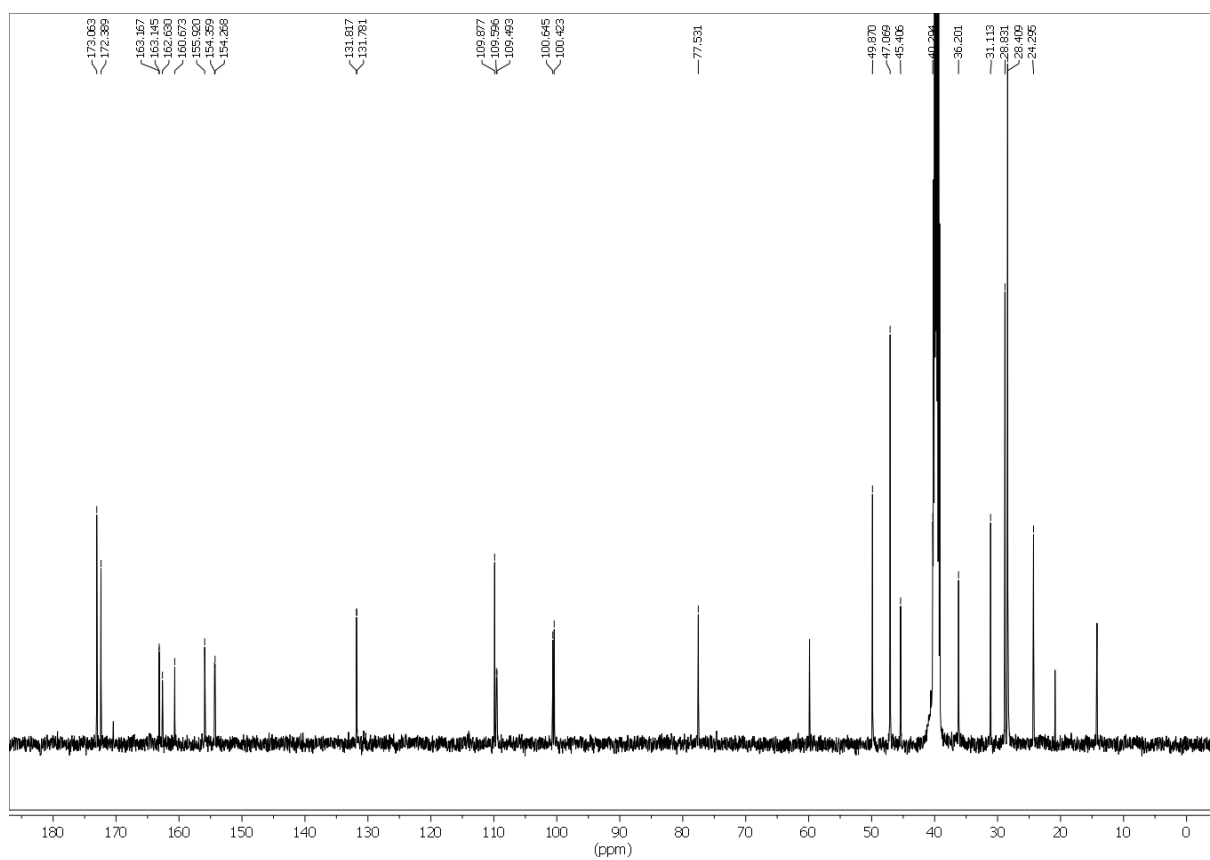

<sup>1</sup>H and <sup>13</sup>C NMR spectrum of compound **41h**

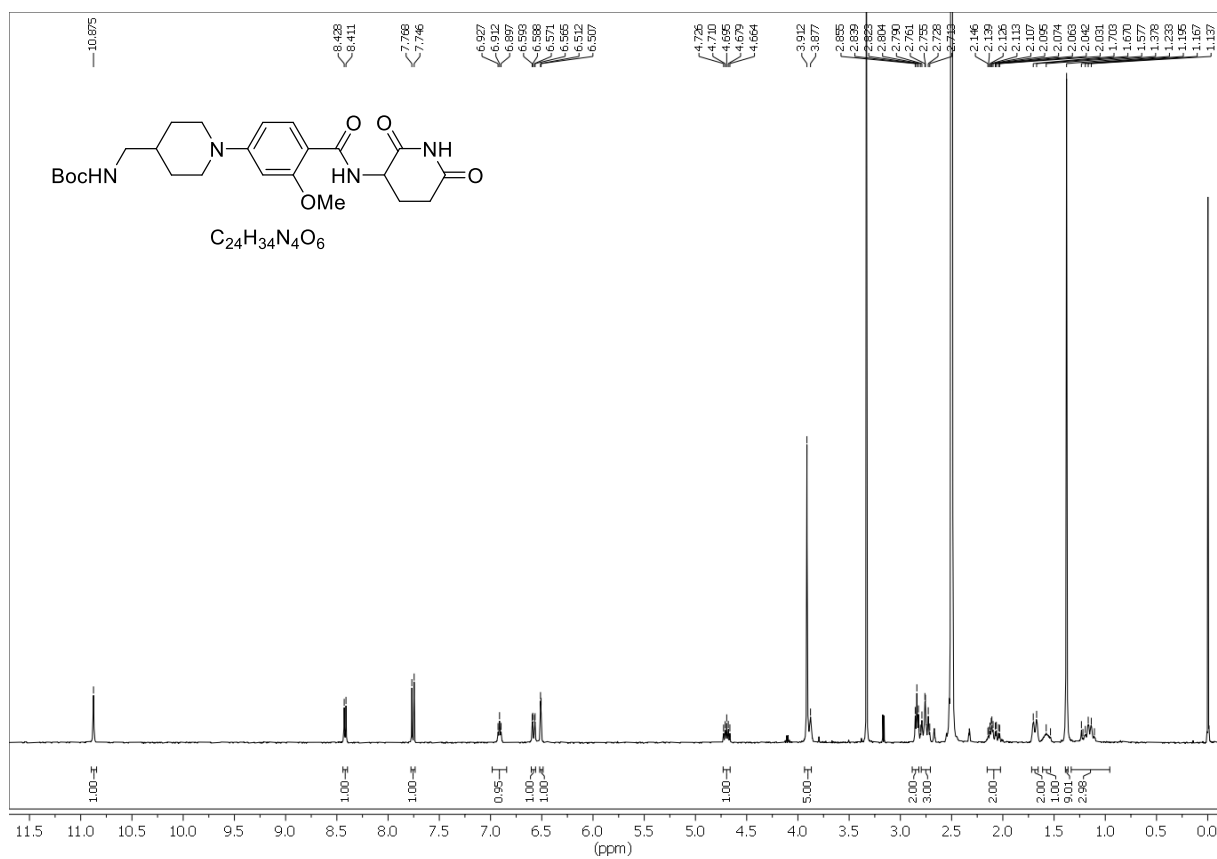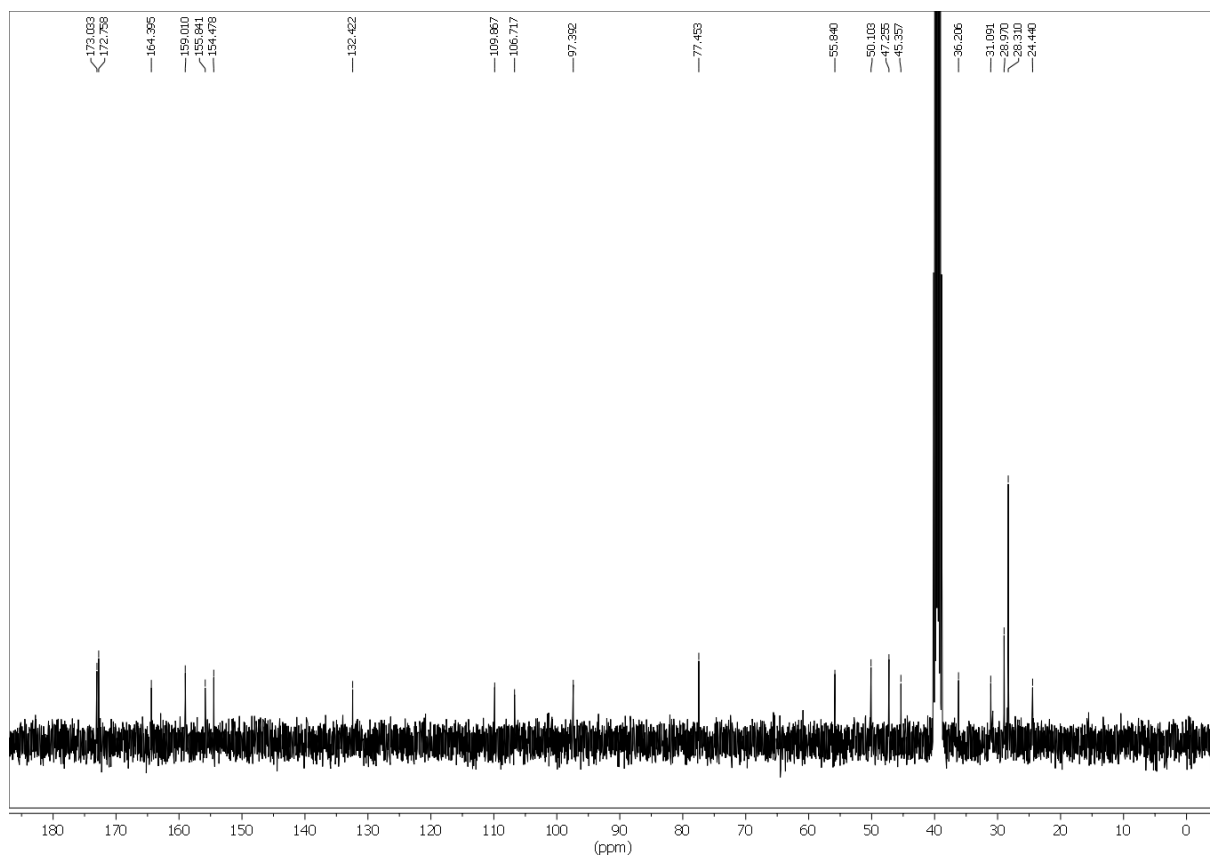

<sup>1</sup>H and <sup>13</sup>C NMR spectrum of compound 43h

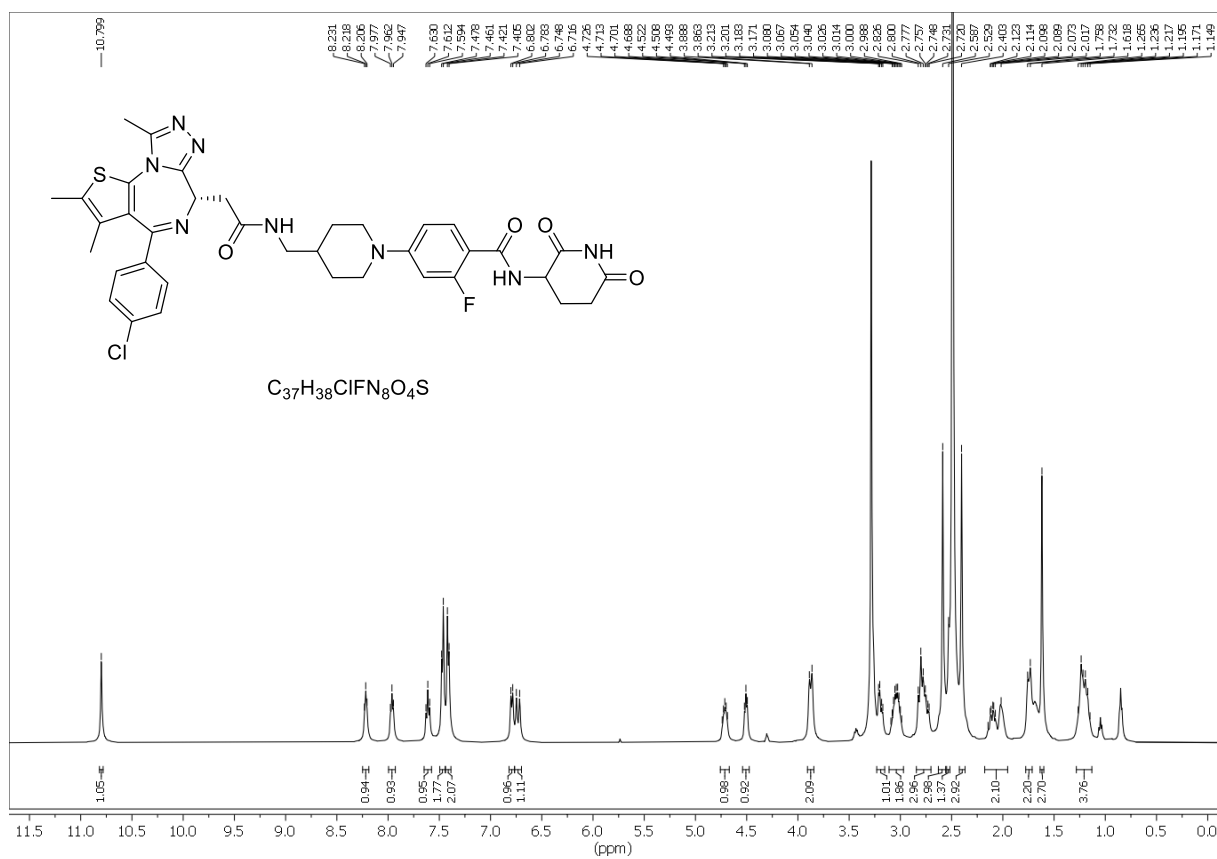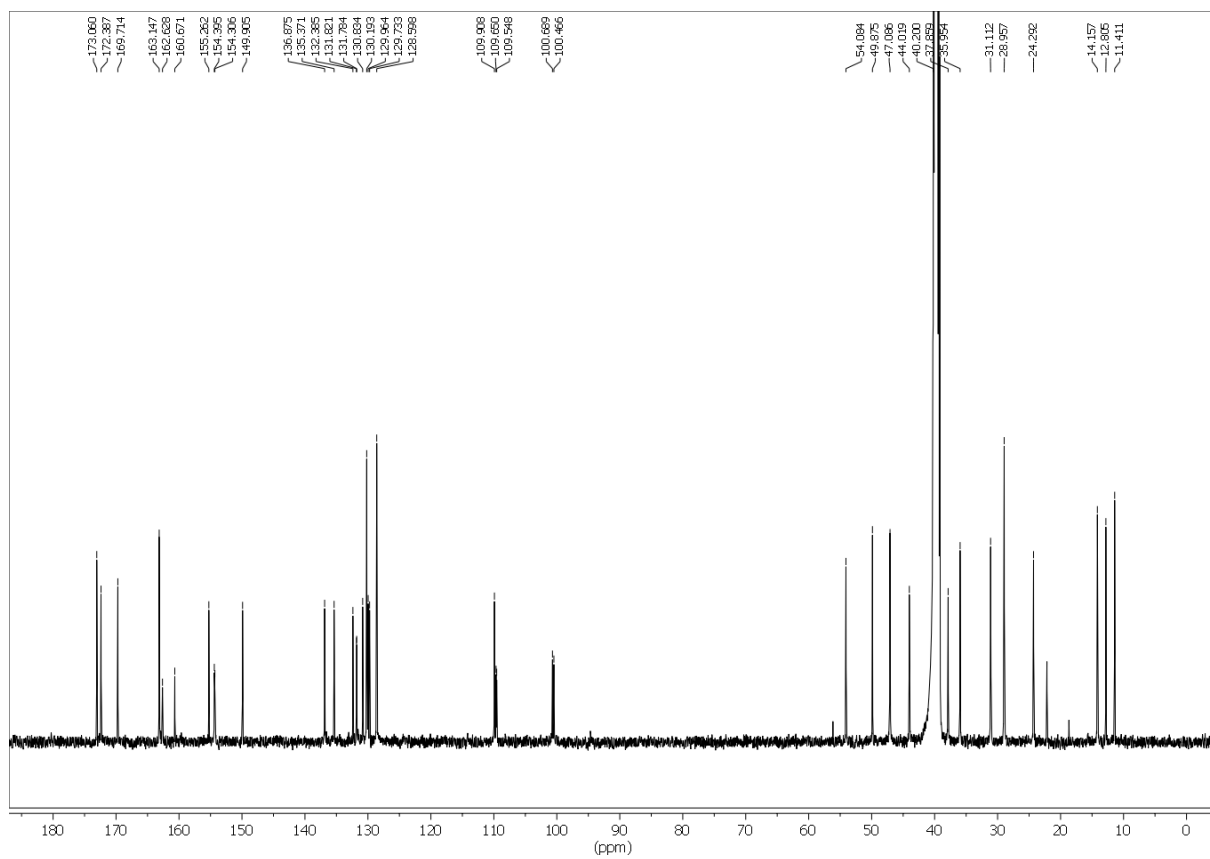

# $^1\text{H}$ and $^{13}\text{C}$ NMR spectrum of compound **44h**

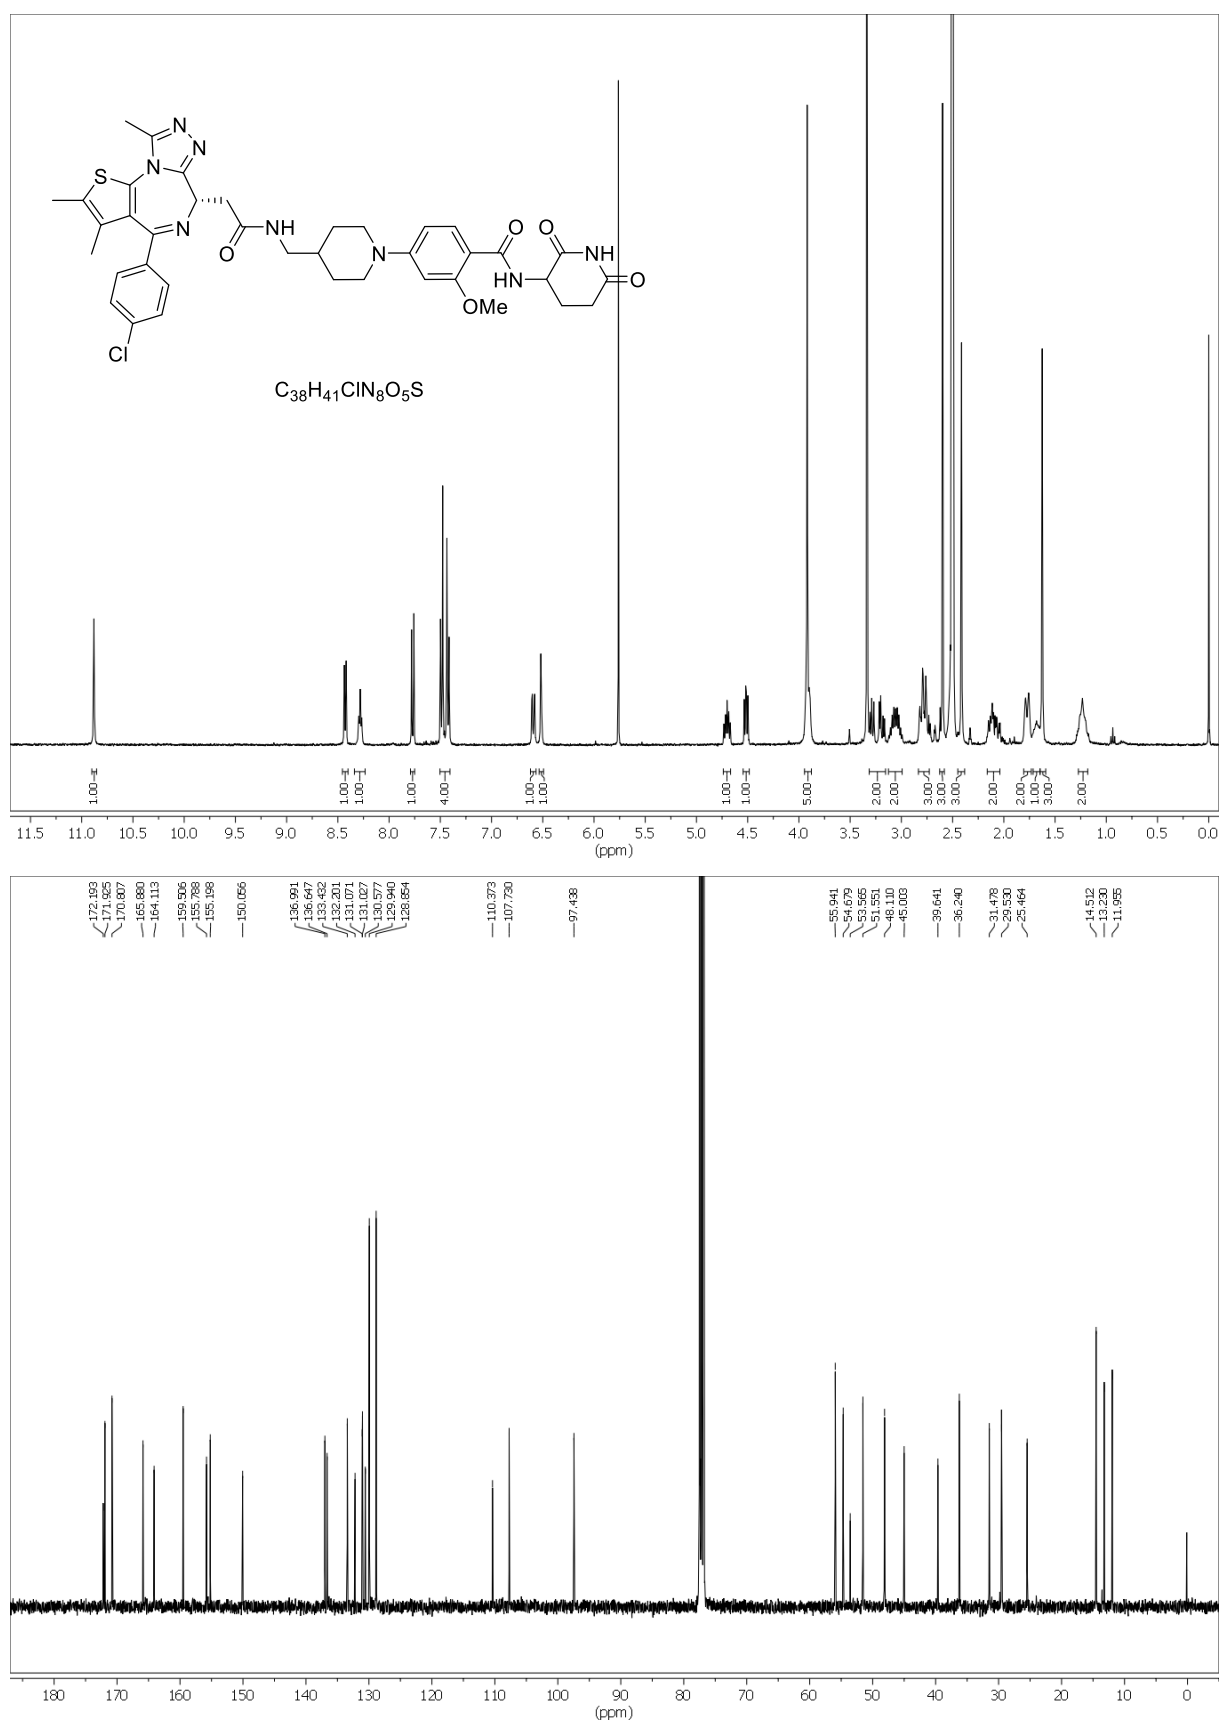

# LC/MS traces of compound **43h** (CST991)

**Sequence Name:** SingleSample  
**Data file:** CST991\_ACN.dx **Project Name:** Single Quad  
**Sample name:** CST991\_ACN **Operator :** SYSTEM  
**Instrument:** Single Quad **Acquired on:** 2022-01-03 15:44:02+01:00  
**Inj. volume:** 2.000 **Location:** P2-C4  
**Acq. method:** 00-new\_wasser-acn\_standard\_100-1500\_BD-20min.amx  
**Processing method:** MS\_standard\_plot.pmx

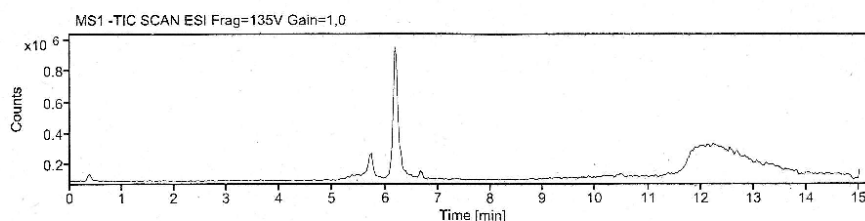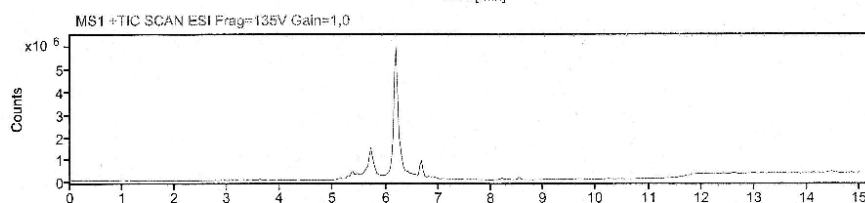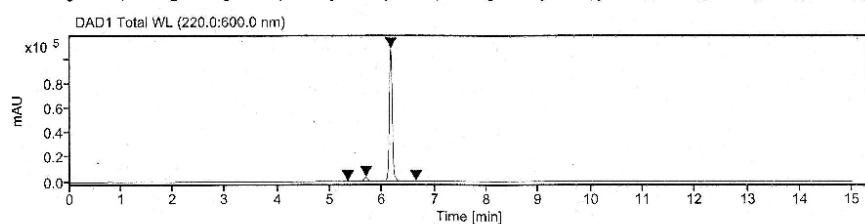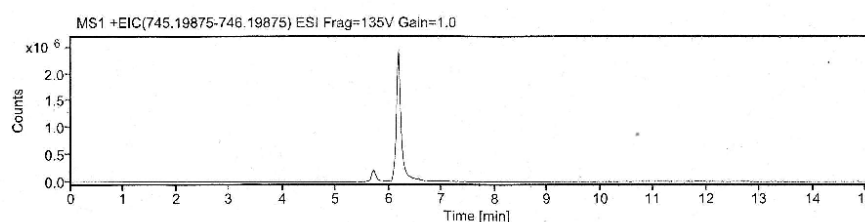

Signal: DAD1 Total WL (220.0:600.0 nm)

| RT [min] | Peak MS Base<br>Peak m/z | Area        | Area%   | Max Peak% | Height     |
|----------|--------------------------|-------------|---------|-----------|------------|
| 5.331    |                          | 609.5820    | 0.1409  | 0.148     | 103.957    |
| 5.687    | 743.500                  | 17904.9675  | 4.1382  | 4.333     | 3630.566   |
| 6.163    | 743.600                  | 413248.2074 | 95.5091 | 100.000   | 107974.656 |
| 6.641    |                          | 916.5494    | 0.2118  | 0.222     | 253.116    |
|          | Sum                      | 432679.3063 |         |           |            |

Signal: MS1 +TIC SCAN ESI Frag=135V Gain=1,0

| RT [min] | Peak MS Base Peak m/z | Area          | Area%   | Max Peak% | Height      |
|----------|-----------------------|---------------|---------|-----------|-------------|
| 5.718    | 743.500               | 6280027.1531  | 13.8687 | 16.102    | 1093226.155 |
| 6.195    | 745.500               | 39001871.5958 | 86.1313 | 100.000   | 5725015.454 |
| Sum      |                       | 45281898.7488 |         |           |             |

Signal: MS1 -TIC SCAN ESI Frag=135V Gain=1,0

| RT [min] | Peak MS Base Peak m/z | Area         | Area%   | Max Peak% | Height     |
|----------|-----------------------|--------------|---------|-----------|------------|
| 5.723    | 759.400               | 802148.4247  | 11.1822 | 12.590    | 141676.158 |
| 6.194    | 743.600               | 6371311.8426 | 88.8178 | 100.000   | 863219.107 |
| Sum      |                       | 7173460.2673 |         |           |            |

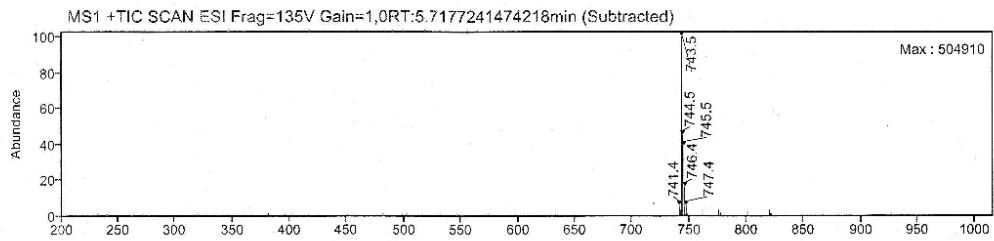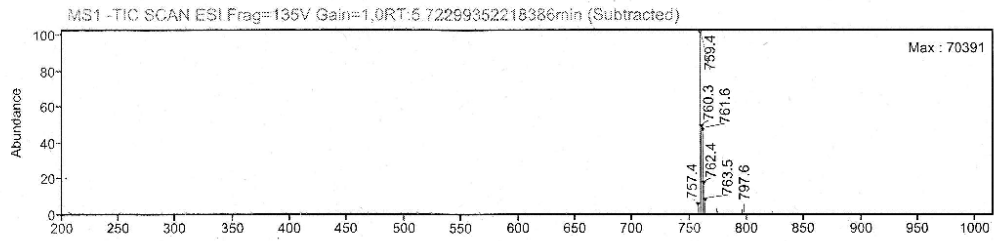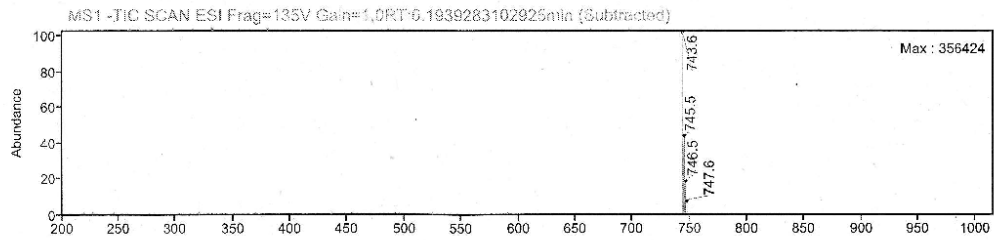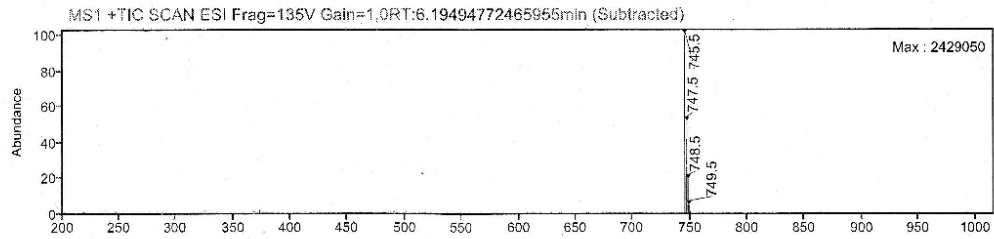

# HPLC trace of compound **44h** (SAB650)

Instrument:ULTIMATE3000 Sequence:Purity\_PROTAC\_30012023

Page 1 of 1

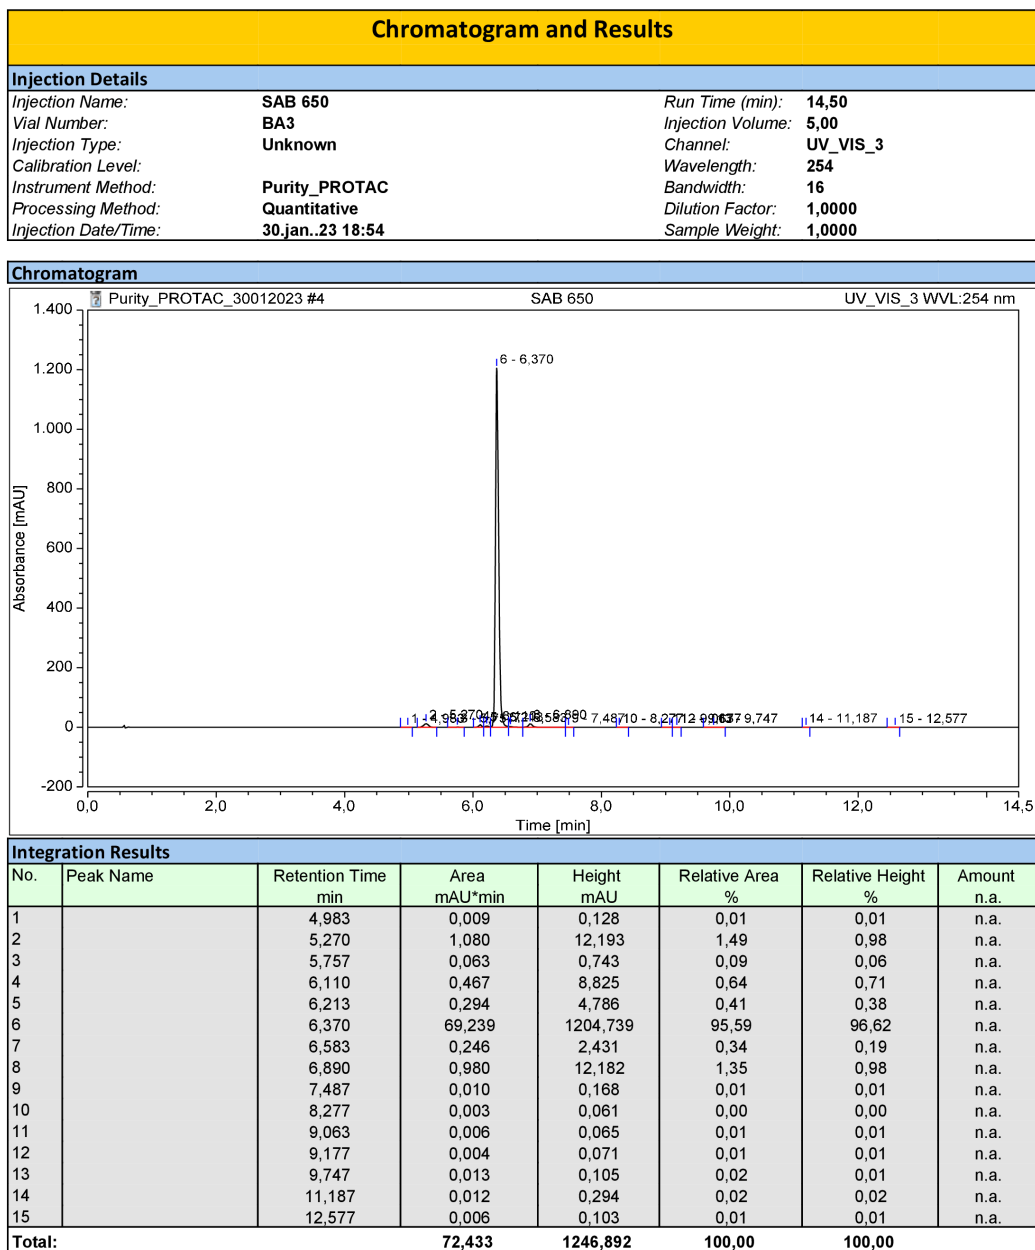

## References

- (1) Maiwald, S.; Heim, C.; Hernandez Alvarez, B.; Hartmann, M. D. Sweet and Blind Spots in E3 Ligase Ligand Space Revealed by a Thermophoresis-Based Assay. *ACS Med. Chem. Lett.* **2021**, *12* (1), 74–81. <https://doi.org/10.1021/acsmchemlett.0c00440>.
- (2) Archer, S.; Seyed-Mozaffari, A.; Simon, E. J.; Gioannini, T. L. Opioid Ligands Related to Tifluadom. *Eur. J. Med. Chem.* **1989**, *24* (6), 569–572. [https://doi.org/10.1016/0223-5234\(89\)90022-6](https://doi.org/10.1016/0223-5234(89)90022-6).
- (3) Cherney, E. C.; Zhang, L.; Lo, J.; Huynh, T.; Wei, D.; Ahuja, V.; Quesnelle, C.; Schieven, G. L.; Futran, A.; Locke, G. A.; Lin, Z.; Monereau, L.; Chaudhry, C.; Blum, J.; Li, S.; Fereshteh, M.; Li-Wang, B.; Gangwar, S.; Pan, C.; Chong, C.; Zhu, X.; Posy, S. L.; Sack, J. S.; Zhang, P.; Ruzanov, M.; Harner, M.; Akhtar, F.; Schroeder, G. M.; Vite, G.; Fink, B. Discovery of Non-Nucleotide Small-Molecule STING Agonists *via* Chemotype Hybridization. *J. Med. Chem.* **2022**, *65* (4), 3518–3538. <https://doi.org/10.1021/acs.jmedchem.1c01986>.
- (4) Mertins, P.; Tang, L. C.; Krug, K.; Clark, D. J.; Gritsenko, M. A.; Chen, L.; Clauser, K. R.; Clauss, T. R.; Shah, P.; Gillette, M. A.; Petyuk, V. A.; Thomas, S. N.; Mani, D. R.; Mundt, F.; Moore, R. J.; Hu, Y.; Zhao, R.; Schnaubelt, M.; Keshishian, H.; Monroe, M. E.; Zhang, Z.; Udeshi, N. D.; Mani, D.; Davies, S. R.; Townsend, R. R.; Chan, D. W.; Smith, R. D.; Zhang, H.; Liu, T.; Carr, S. A. Reproducible Workflow for Multiplexed Deep-Scale Proteome and Phosphoproteome Analysis of Tumor Tissues by Liquid Chromatography–Mass Spectrometry. *Nat. Protoc.* **2018**, *13* (7), 1632–1661. <https://doi.org/10.1038/s41596-018-0006-9>.
- (5) Demichev, V.; Messner, C. B.; Vernardis, S. I.; Lilley, K. S.; Ralser, M. DIA-NN: Neural Networks and Interference Correction Enable Deep Proteome Coverage in High Throughput. *Nat. Methods* **2020**, *17* (1), 41–44. <https://doi.org/10.1038/s41592-019-0638-x>.
